# Supplementary material
Source: publisher figshare collection journal article supplement (https://gsajournals.figshare.com/ndownloader/files/21216546)
Supplement: Supplementary file 1 [file 21216546]

**File S2.** Tardigrade mitochondrial sequences used for removing mitochondrial sequences from the raw transcriptome reads

.>lcl|MF441491.1_cds_ASY06634.1_1 [gene=COI] [protein=cytochrome oxidase subunit 1] [protein_id=ASY06634.1] [location=<1..>771] [gbkey=CDS]

AATCATAAAGATATTGGCTCTCTTTATTTCCTATTTGGATTATGATCCGCTTGTATGGGGACTTCATTAA

GTATAATTGTGCGATTTGAATTAAGACAGCCCGGAAGTTTACTTAATGATGAACAAATTTACAATGTCAG

AGTGACTAGACACGCATTCGTTATAATTTTTTTTTTTGTTATACCTGTGTTAATTGGGGGGTTTGGAAAT

TGATTAATCCCACTTATATTAAATGCACCTGATATAGCTTTTCCTCGAATAAATAATTTAAGATTTTGAT

TATTACCACCTTCAATTATTCTCATCTTAATGAGATCAATAGCTGAACAAGGGGCCGGAACAGGGTGAAC

TGTTTATCCCCCCCTATCCAATTTTTTTGCTCATAGGGGCCCTAGAGTAGATATAACAATTTTTTCCCTT

CATATTGCAGGGGCTTCCTCAATTCTTGGAGCTATTAATTTTATTACTACAATTTTAAATATACGAGTAG

CTTCAATAACCATAGACTTAATTCCTCTTTTTATTTGATCAGTATTACTCACAGCTATTTTATTATTATT

ATCACTACCTGTCTTAGCAGGTGCAATTACTATACTCCTTCTTGACCGAAATTTTAACACATCTTTCTTT

GATCCTGCAGGAGGAGGAGATCCTCTATTATATCAACATTTATTCTGATTCTTCGGACATCCAGAAGTTT

ATATTTTAATCTTACCAGGATTTGGAATAATTTCTCAAATTATTACTCATTTTAGAGGAAAACATTCAAC

A

>lcl|KX810044.1_cds_AOQ26531.1_1 [gene=COI] [protein=cytochrome c oxidase subunit I] [protein_id=AOQ26531.1] [location=<1..>584] [gbkey=CDS]

GTGGGCACTTCCTTAAGATTTATTATCCGTTCAGAGTTAAGCCAACCAGGACATTTATTTTCTGACGAAC

AATTTTATAATGTAACAGTAACCAGTCATGCTTTTATTATAATTTTTTTTTTTGTTATACCTGTCCTAAT

TGGAGGTTTTGGAAATTGACTAGTACCTCTTATAATTAGCGCTCCAGATATAGCGTTTCCCCGGATAAAT

AACTTAAGTTTTTGATTATTGCCCCCATCTCTTATTTTAATTTCAGCTAGAACAATAGCGGAACAAGGAG

CAGGTACGGGGTGAACAGTATACCCACCACTTTCAAATTACTTTGCTCATAGTGGGCCGAGAGTAGACTT

AACAATTTTTTCTCTACACATTGCTGGCATTTCCTCTATTTTAGGGGCCATTAACTTTATCTGTACTATC

CTTAATATACGAACTCCCCACATATCACTAGAACAAATACCCCTGTTCGTTTGATCTGTTTTAATTACTG

CTATTTTACTGTTGTTGGCCTTGCCTGTATTAGCAGGAGGAATTACAATATTACTGATAGACCGTAATTT

TAACACCTCTTTTTTTGATCCGGC

>lcl|KX810043.1_cds_AOQ26530.1_1 [gene=COI] [protein=cytochrome c oxidase subunit I] [protein_id=AOQ26530.1] [location=<1..>431] [gbkey=CDS]

GGTTTTGGAAATTGACTAGTACCTCTTATAATTAGCGCTCCCGATATAGCGTTTCCCCGGATAAATAAAT

TAAGTTTTTGATTATTGCCCCCATCTCTTATTTTAATTTCAGCTAGAACAATAGCGGAACAAGGAGCAGG

TACGGGGTGAACAGTATACCCACCACTTTCAAACTACTTTGCTCATAGTGGGCCGAGAGTAGACTTAACA

ATTTTTTCTCTACACATTGCTGGCATTTCCTCTATTTTAGGGGCCATTAACTTTATCTGTACTATCCTCA

ATATACGAACTCCCCACATATCACTAGAACAAATACCCCTGTTCGTTTGATCTGTTTTAATTACTGCTAT

TTTACTGTTATTGGCCTTGCCTGTATTAGCAGGAGGAATTACAATATTACTGATAGACCGTAATTTTAAC

ACCTCTTTTTT

>lcl|KX810042.1_cds_AOQ26529.1_1 [gene=COI] [protein=cytochrome c oxidase subunit I] [protein_id=AOQ26529.1] [location=<1..>587] [gbkey=CDS]

ACAGTGGGCACTTCCTTAAGATTTATTATCCGTTCAGAATTAAGCCAACCAGGACATTTATTTTCTGACG

AACAATTTTATAATGTAACAGTAACCAGTCATGCTTTTATTATAATTTTTTTTTTTGTTATACCTGTCCT

AATTGGAGGTTTTGGAAATTGACTAGTACCTCTTATAATTAGCGCTCCCGATATAGCGTTTCCCCGGATA

AATAACTTAAGTTTTTGATTATTGCCCCCATCTCTTATTTTAATTTCAGCTAAAACAATAGCGGAACAAG

GAGCAGGTACGGGGTGAACAGTATACCCACCACTTTCAAACTACTTTGCTCATAGTGGGCCGAGTGTAGA

CTTAACAATTTTTTCTTTACACATTGCTGGCATTTCCTCTATTTTAGGGGCCATTAACTTTATCTGCACT

ATCCTCAATATACGAACTCCCCACATATCACTAGAACAAATACCCCTGTTCGTCTGATCTGTTTTAATTA

CTGCTATTTTACTGTTATTGGCCTTGCCTGTATTAGCAGGAGGAATTACAATATTACTGATAAACCGTAA

TTTTAACACCTCTTTTTTTGATCCGGC

>lcl|FJ184604.1_cds_ACI12828.1_1 [gene=COI] [protein=cytochrome oxidase subunit I] [protein_id=ACI12828.1] [location=<1..>630] [gbkey=CDS]

TGGAATTGATGTGCAACAGTAGGCACATCATTGAGAATACTAATTCGAGCTGAACTAAGACAACCTGGCA

ATCTTTTAGCGGATGAGCAAATTTATAATGTAACAGTAACAAGTCATGCTTTTATTATAATTTTTTTTTT

TGTAATACCAATCCTAATTGGAGGATTTGGAAATTGATTAGTCCCCCTAATAATTGGAGCCCCAGACATG

GCATTTCCTCGAATAAACAATTTAAGATTTTGACTACTACCCCCCTCATTTTTTTTGATTACTACAAGAA

CAATAAGAGAACAAGGTGCAGGAACAGGTTGAACAGTATACCCTCCATTAGCTCATTATTTTGCACACAG

AGGCCCAGCAGTAGATTTAACAATTTTTTCTCTTCATTTAGCAGGAATTTCTTCAATTTTAGGAGCTGTA

AATTTTATTTCTACAATTATTAATATACGATCCTTATCAATATCTCTAGAAAATATGCCTCTTTTTGTTT

GATCCGTCCTAATTACAGCAGTTTTATTATTATTAGCCCTACCAGTTTTGGCTGGGGCAATCACTATATT

ACTTCTAGATCGAAACTTTAATACTTCTTTTTTTGATCCAGCAGGTGGAGGAGACCCAATTCTTTATCAA

>lcl|FJ184603.1_cds_ACI12827.1_1 [gene=COI] [protein=cytochrome oxidase subunit I] [protein_id=ACI12827.1] [location=<1..>630] [gbkey=CDS]

TGGAATTGATGTGCAACAGTAGGCACATCATTGAGAATACTAATTCGAGCTGAACTAAGACAACCTGGCA

ATCTTTTAGCGGATGAGCAAATTTATAATGTAACAGTAACAAGTCATGCTTTTATTATAATTTTTTTTTT

TGTAATACCAATCCTAATTGGAGGATTTGGAAATTGATTAGTCCCCCTAATAATTGGAGCCCCAGACATG

GCATTTCCTCGAATAAACAATTTAAGATTTTGACTACTACCCCCCTCATTTTTTTTGATTACTACAAGAA

CAATAAGAGAACAAGGTGCAGGAACAGGTTGAACAGTATACCCTCCATTAGCTCATTATTTTGCACACAG

AGGCCCAGCAGTAGATTTAACAATTTTTTCTCTTCATTTAGCAGGAATTTCTTCAATTTTAGGAGCTGTA

AATTTTATTTCTACAATTATTAATATACGATCCTTATCAATATCTCTAGAAAATATGCCTCTTTTTGTTT

GATCCGTCCTAATTACAGCAGTTTTATTATTATTAGCCCTACCAGTTTTGGCTGGGGCAATCACTATATT

ACTTCTAGATCGAAACTTTAATACTTCTTTTTTTGATCCAGCAGGTGGAGGAGACCCAATTCTTTATCAA

>lcl|FJ184602.1_cds_ACI12826.1_1 [gene=COI] [protein=cytochrome oxidase subunit I] [protein_id=ACI12826.1] [location=<1..>630] [gbkey=CDS]

TGGAATTGATGTGCAACAGTAGGCACATCATTGAGAATACTAATTCGAGCTGAACTAAGACAACCTGGCA

ATCTTTTAGCGGATGAGCAAATTTATAATGTAACAGTAACAAGTCATGCTTTTATTATAATTTTTTTTTT

TGTAATACCAATCCTAATTGGAGGATTTGGAAATTGATTAGTCCCCCTAATAATTGGAGCCCCAGACATG

GCATTTCCTCGAATAAACAATTTAAGATTTTGACTACTACCCCCCTCATTTTTTTTGATTACTACAAGAA

CAATAAGAGAACAAGGTGCAGGAACAGGTTGAACAGTATACCCTCCATTAGCTCATTATTTTGCACACAG

AGGCCCAGCAGTAGATTTAACAATTTTTTCTCTTCATTTAGCAGGAATTTCTTCAATTTTAGGAGCTGTA

AATTTTATTTCTACAATTATTAATATACGATCCTTATCAATATCTCTAGAAAATATGCCTCTTTTTGTTT

GATCCGTCCTAATTACAGCAGTTTTATTATTATTAGCCCTACCAGTTTTGGCTGGGGCAATCACTATATT

ACTTCTAGATCGAAACTTTAATACTTCTTTTTTTGATCCAGCAGGTGGAGGAGACCCAATTCTTTATCAA

>lcl|FJ184601.1_cds_ACI12825.1_1 [gene=COI] [protein=cytochrome oxidase subunit I] [protein_id=ACI12825.1] [location=<1..>630] [gbkey=CDS]

TGGAATTGATGTGCAACAGTAGGCACATCATTGAGAATACTAATTCGAGCTGAACTAAGACAACCTGGCA

ATCTTTTAGCGGATGAGCAAATTTATAATGTAACAGTAACAAGTCATGCTTTTATTATAATTTTTTTTTT

TGTAATACCAATCCTAATTGGAGGATTTGGAAATTGATTAGTCCCCCTAATAATTGGAGCCCCAGACATG

GCATTTCCTCGAATAAACAATTTAAGATTTTGACTACTACCCCCCTCATTTTTTTTGATTACTACAAGAA

CAATAAGAGAACAAGGTGCAGGAACAGGTTGAACAGTATACCCTCCATTAGCTCATTATTTTGCACACAG

AGGCCCAGCAGTAGATTTAACAATTTTTTCTCTTCATTTAGCAGGAATTTCTTCAATTTTAGGAGCTGTA

AATTTTATTTCTACAATTATTAATATACGATCCTTATCAATATCTCTAGAAAATATGCCTCTTTTTGTTT

GATCCGTCCTAATTACAGCAGTTTTATTATTATTAGCCCTACCAGTTTTGGCTGGGGCAATCACTATATT

ACTTCTAGATCGAAACTTTAATACTTCTTTTTTTGATCCAGCAGGTGGAGGAGACCCAATTCTTTATCAA

>lcl|EU244610.1_cds_ACD13144.1_1 [gene=COI] [protein=cytochrome oxidase subunit I] [frame=3] [protein_id=ACD13144.1] [location=<1..>709] [gbkey=CDS]

TCAACAAATCATAAAGATATTGGAACCTTATACTTTATGTTCGGTCTTTGAGCTGCAACAGTAGGTACTT

CTCTAAGATTTATTATTCGATCAGAACTTAGACAACCTGGGAATCTTTTAAGAGATGAGCAACTTTATAA

TGTAACGGTGACCAGCCACGCATTTGTGATAATTTTTTTTTTCGTCATACCCATCCTAATTGGGGGTTTC

GGAAATTGGTTAGTTCCCCTAATAATTAGTGCCCCTGATATAGCATTCCCGCGAATGAACAATATAAGGT

TTTGGCTATTGCCGCCTTCTTTTATATTAATTATAACAAGAACTATGGCAGAACAAGGGGCAGGAACAGG

ATGAACGGTATACCCTCCCTTATCTCAATACTTCGCCCATAGGGGGCCTAGAATTGACTTAACAATCTTC

TCACTACATATTGCCGGAGTTTCCTCTATTTTAGGGGCTATTAATTTTATCTCAACAATTATTAACATAC

GACCGCCCTCTATAACAATAGAAAACATACCATTATTTGTATGGTCAGTTTTAATCACAGCTGTATTACT

TCTGTTAGCCCTTCCGGTATTAGCAGGAGGAATCACAATACTGCTCTTAGACCGAAACTTTAACACTTCT

TTTTTTGATCCAGCAGGGGGGGGAGACCCCGTGCTATACCAGCACTTGTTTTGATTTTTTGGTCACCCTG

AAGTTTA

>lcl|EU244607.1_cds_ACD13143.1_1 [gene=COI] [protein=cytochrome oxidase subunit I] [frame=3] [protein_id=ACD13143.1] [location=<1..>709] [gbkey=CDS]

TCAACAAATCATAAAGATATTGGTACCTTATACTTCATTTTCGGGCTATGGGCCGCCACAGTTGGGACCT

CATTGAGATTTCTAATCCGGTCTGAGCTGAGCCAACCAGGAAGTCTTATAGGAGATGAACAGCTCTATAA

CGTAACAGTAACTAGACATGCATTTGTTATAATTTTTTTTTTTGTCATGCCCGTTCTAATCGGAGGATTT

GGTAACTGGCTAGTTCCGCTAATAGTTAGAGCCCCCGACATAGCTTTTCCACGTATAAATAATATAAGAT

TTTGGCTTCTACCACCCTCTTTTACTCTGATCATAACTAGCACAATAAGGGAACAGGGGGCGGGGACCGG

GTGAACAGTATACCCGCCTTTATCTCAATACTTTGCCCATAGGGGTCCAAGGGTGGACTTAACTATTTTT

TCTCTTCATGTAGCAGGAGTATCTTCTATTTTAGGAGCAATTAATTTCATCTCAACAATTATAAATATAC

GCCCACCCTCAATGAGAATAGAAAACATACCCCTATTTGTATGATCCGTATTAATCACAGCAGTACTGTT

ATTGTTAGCCCTACCAGTGCTTGCAGGGGGAATTACTATACTGCTGATAGACCGAAATTTCAACACCTCT

TTTTTTGACCCTGCGGGAGGGGGGGACCCAATCTTATACCAACACTTGTTCTGATTTTTTGGTCACCCTG

AAGTTTA

>lcl|EU244606.1_cds_ACD13142.1_1 [gene=COI] [protein=cytochrome oxidase subunit I] [frame=3] [protein_id=ACD13142.1] [location=<1..>709] [gbkey=CDS]

TCAACAAATCATAAAGATATTGGAACCTTATACTTTATGTTCCGTCTTTGAGCTGCAACAGTAGGTACTT

CTCTAAGATTTATTATTCGATCAGAACTTAGACAACCTGGGAATCTTTTAAGAGATGAGCAACTTTATAA

TGTAACGGTGACCAGCCACGCATTTGTGATAATTTTTTTTTTCGTCATACCCATCCTAATTGGGGGTTTC

GGAAATTGGTTAGTTCCCCTAATAATTAGTGCCCCTGATATAGCATTCCCGCGAATGAACAATATAAGGT

TTTGGCTATTGCCGCCTTCTTTTATATTAATTATAACAAGAACTATGGCAGAACAAGGGGCAGGAACAGG

ATGAACGGTATACCCTCCCTTATCTCAATACTTCGCCCATAGGGGGCCTAGAGTTGACTTAACAATCTTC

TCACTACATATTGCCGGAGTTTCCTCTATTTTAGGGGCTATTAATTTTATCTCAACAATTATTAACATAC

GACCGCCCTCTATAACAATAGAAAACATACCATTATTTGTATGGTCAGTTTTAATCACAGCTGTATTACT

TCTGTTAGCCCTTCCGGTATTAGCAGGAGGAATCACAATACTGCTCTTAGACCGAAACTTTAACACTTCT

TTTTTTGATCCAGCAGGAGGGGGAGACCCCGTGCTATACCAGCACTTGTTTTGATTTTTTGGTCACCCTG

AAGTTTA

>lcl|EU244604.1_cds_ACD13141.1_1 [gene=COI] [protein=cytochrome oxidase subunit I] [frame=3] [protein_id=ACD13141.1] [location=<1..>709] [gbkey=CDS]

TCAACAAATCATAAAGATATTGGTATATTGTATTTTATTTTTGGTATTTGATGTGCTTTTGTAGGTTCAG

GTTTAAGTGTGTTAATTCGTCTTGAATTATCTCAGCCTAACACAATATTAATAAGTGAAGATATTTATAA

TGCTTTTATTACAAGTCATGCTTTAGTAATGATTTTTTTTTTTGTTATACCTGTTTTAATTGGAGGTTTT

GGAAATTGATTAGTTCCTCTTATAATTAGATCACCAGATATAGCTTTTCCTCGTATTAATAATGTAAGAT

TTTGAATATTAGTTGCTTCTTTTGGTTTGTTGCTTTTTAGAATATTTAGGGGTACAGGAGTAGGAGCTGG

TTGAACACTTTATCCTCCGTTAACTAGGTATAATGGTCATAGCAGTCATGCTGTCGATTATGCAATTTTG

TCTTTACATATTGCAGGAGCATCGTCAATTTTTAGTGCACTGAATTTTTTAACGACGATTATTAATATAC

ACTATTTTGGAGTACGAATAGATAAATTACCGTTGTTTGTGTGATCGATTTTTATTACTGCTCTATTGTT

AGTTTTGGCTTTACCAGTACTTGCTGGAGCAATTACAATATTAATTTCTGATCGTAATTTCACTACTACA

TTTTTTGATCCGGCAGGGGGAGGAGATCCTGTTTTATTTCAACATTTATTTTGATTTTTTGGTCACCCTG

AAGTTTA

>lcl|EU244601.1_cds_ACD13140.1_1 [gene=COI] [protein=cytochrome oxidase subunit I] [frame=3] [protein_id=ACD13140.1] [location=<1..>709] [gbkey=CDS]

TCAACAAATCATAAAGATATTGGCACTTTATATTTTATTTTTGGTTTATGATCTGCCTCTGTTGGTTCCA

GTTTAAGTTTTATTATTCGTACAGAGTTGTCCCAACCTGGGATTTGGCTTGGTGATGAACATTTATATAA

TGTATTAGTTACTTCTCATGCTTTTATTATGATTTTTTTCATGGTTATACCTATTTTAATTGGGGGGTTT

GGTAATTGGTTAATTCCTATTATAATTGGGGCTCCTGATATGTCATTTCCTCGAATAAATAATTTAAGTT

TTTGATTATTACCCCCCTCCCTTATTTTATTATTAGTTTCTTCTAATGTTAGTTCAGGTGTAGGTTCAGG

TTGAACTATATACCCCCCATTATCTGAATTTATTGGGCATTCAAATTTTACTGTTGATATAGCTATTTTC

TCTTTACATATTGCTGGTGCTTCTTCAATTCTAGGAGCTATTAATTTTATTACGACTATTATTAATATAC

GTTTTTATTCACAAAAATTAGAACAAAGTTCATTATTTGTTTGATCTGTTTTAATTACAGCTATTTTACT

TTTATTATCATTACCTGTGCTTGCTGGTGGTATTACTATGTTGTTATTAGATCGGAATTTTAATAGTTCT

TTTTTTGACCCAGCTGGGGGTGGAGATCCTATTTTGTTTCAACACCTGTTTTGATTTTTTGGTCACCCTG

AAGTTTA

>lcl|EU244599.1_cds_ACD13139.1_1 [gene=COI] [protein=cytochrome oxidase subunit I] [frame=3] [protein_id=ACD13139.1] [location=<1..>709] [gbkey=CDS]

TCAACAAATCATAAAGATATTGGAACTATTTATTTTATTTTTGGATTATGAGCTGCCACGATCGGCACAT

CTTTAAGATTTATTGTACGATCAGAGCTTAGACAGCCAGGAAATTTATTTAATGATGAACAACTTTTTAA

TGTTACAGTGACAAGACATGCATTCGTAATAATTTTCTTTTTTGTTATACCCATTTTAATTGGGGGATTT

GGTAATTGATTGGTCCCTCTAATAATTGGAGCTCCGGACATAGCTTTCCCCCGTATAAATAATCTTAGAT

TCTGGCTATTACCCCCCTCATTTTTCTTAATTTTAATCGGTACTATAGCTGAACAAGGTGCTGGAACAGG

ATGAACAGTATACCCCCCGCTATCCAATTATTTTGCACATAGAGGACCTAGTGTAGACCTCACTATTTTT

TCTCTTCATATTGCAGGCGCTTCCTCCATCCTAGGGGCTATTAATTTTATCACCACTATTATAAATATAC

GATCTAAAAATATAACCATAGAACAAACCCCTTTATTTGTGTGATCTGTTTTAATCACTGCCACTTTATT

ATTATTAGCCCTTCCTGTTTTAGCTGGAGCTATTACTATACTATTATTAGACCGAAACTTTAATACTTCC

CTTTTTGACCCGGCTGGTGGGGGAGACCCTATTCTATATCAACACTTATTTTGATTTTTTGGTCACCCTG

AAGTTTA

>lcl|EU244598.1_cds_ACD13138.1_1 [gene=COI] [protein=cytochrome oxidase subunit I] [frame=3] [protein_id=ACD13138.1] [location=<1..>709] [gbkey=CDS]

TCAACAAATCATAAAGATATTGGAACTCTTTATTTTATTTTTGGATTATGAGCTGCCACGATCGGCACAT

CTCTAAGATTTATTGTACGATCAGAGCTTAGACAACCAGGAAATTTATTTAATGATGAACAACTTTTTAA

TGTTACAGTGACAAGACATGCATTCGTAATAATTTTCTTTTTTGTTATACCCATTTTAATTGGGGGATTT

GGTAATTGATTAGTCCCTCTAATAATTGGAGCTCCGGACATAGCTTTTCCCCGTATAAATAATCTTAGAT

TCTGACTATTACCCCCCTCATTTTTCTTAATTTTAATTGGTACTATAGCTGAACAAGGTGCTGGGACAGG

ATGAACAGTATACCCCCCATTATCCAATTATTTTGCACATAGAGGACCTAGTGTAGACCTTACTATTTTT

TCTCTTCATATTGCTGGTGTTTCCTCCATCCTAGGGGCTATTAATTTTATTACTACTATTATAAATATAC

GATCTAAAAATATAACCATAGAACAAACCCCCCTATTTGTGTGATCTGTTTTAATTACTGCCATTTTATT

ATTATTAGCCCTTCCTGTTTTAGCTGGAGCTATTACTATGCTATTGTTAGACCGAAACTTTAATACTTCT

TTCTTTGACCCGGCTGGTGGGGGAGACCCTATTCTGTATCAACACTTATTTTGATTTTTTGGTCACCCTG

AAGTTTA

>lcl|EU244597.1_cds_ACD13137.1_1 [gene=COI] [protein=cytochrome oxidase subunit I] [frame=3] [protein_id=ACD13137.1] [location=<1..>709] [gbkey=CDS]

TCAACAAATCATAAAGATATTGGGACTCTCTATTTTATTTTTGGGCTTTGGGCAGCCACCATTGGGACCT

CTTTGAGATTTATTATCCGATCTGAATTAAGCCAACCTGGACAATTGTTTGCAGACGAGCAATTATTTAA

TGTTACAGTAACAGGACATGCCTTTGTTATAATTTTCTTTTTTGTGATACCTATTCTTATTGGGGGGTTT

GGTAACTGATTGGTCCCCCTCATAATTGGGGCTCCAGATATGGCTTTTCCTCGAATAAACAACTTAAGAT

TTTGACTCCTGCCTCCTTCTTTTCTTCTTATCCTTATGGGAACAATGGCAGAACAAGGGGCGGGTACTGG

ATGAACTGTTTACCCGCCACTCTCCCACTATTTTGCTCATAGCGGCCCTAGGGTTGACCTAACAATTTTT

TCTCTTCATATCGCCGGAGCATCTTCTATTTTAGGAGCTATTAATTTTATTACTACAATTCTTAATATAC

GATCTTATTCTATAAGAATAGAGCAAATACCTTTATTTGTATGGTCAGTGCTTATCACCGCTATTTTACT

CCTTTTAGCTCTACCCGTTTTAGCTGGGGCTATTACTATACTACTTCTAGACCGAAATTTTAATACTTCT

TTTTTTGACCCAGCAGGAGGGGGGGACCCTATTTTATACCAGCATCTGTTTTGATTTTTTGGTCACCCTG

AAGTTTA

>lcl|EF620382.1_cds_ABV25051.1_1 [gene=COI] [protein=cytochrome oxidase subunit I] [frame=3] [protein_id=ABV25051.1] [location=<1..>626] [gbkey=CDS]

TCTGCTTCTGTTGGGTCTAGTTTGAGTTTTATTATTCGTACAGAATTAGCTCAACCTGGTATTTTTTTGG

GTGATGAACATTTATATAATGTTTTTGTTACTTCTCATGCTTTAATTATAATTTTTTTTATGGTTATACC

TATTTTGATTGGAGGTTTTGGAAATTGGTTGATTCCTTTAATAATTGGTGCTCCTGATATAGCTTTTCCT

CGAATAAATAATTTGAGTTTTTGATTATTACCTCCATCTTTGATGTTATTAATTAGTTCTTCTAATATTA

GCTCAGGGGCAGGTACTGGTTGAACTATATACCCCCCTTTGTCAGAATATATTGGTCATTCAAATGTTAC

TGTTGATATAGCTATTTTTTCTTTACATATCGCAGGAGCTTCTTCAATTTTAGGGGCTGTAAATTTTATT

ACAACTATTATTAATATGCGTATAAAATCTCAAAATATAGAACAAATAACTTTATTTGTTTGGTCTGTCT

TAATTACTGCTATTTTATTATTATTATCTCTTCCTGTTTTAGCTGGCGGAATTACTATATTATTATTAGA

TCGTAATTTTAATAGTTCTTTTTTTGATCCTGCTGGTGGTGGTGACCCTGTTCTTTTTCAACAT

>lcl|EF620381.1_cds_ABV25050.1_1 [gene=COI] [protein=cytochrome oxidase subunit I] [frame=3] [protein_id=ABV25050.1] [location=<1..>626] [gbkey=CDS]

TCTGCCTCTGTTGGTTCCAGTTTAAGTTTTATTATTCGTACAGAGTTATCCCAACCTGGGATTTGGCTTG

GTGATGAACATTTATATAATGTATTAGTTACTTCTCATGCTCTTATTATGATTTTTTTCATGGTTATACC

TATTTTAATTGGGGGGTTTGGTAATTGGTTAATTCCTATTATAATTGGGGCTCCTGATATATCATTTCCT

CGAATAAATAATTTAAGTTTTTGATTATTACCCCCCTCCCTTATTTTATTATTAGTTTCTTCTAATGTTA

GTTCAGGTGTAGGTTCAGGTTGAACTATATACCCCCCATTATCTGAATTCATTGGGCATTCAAATTTTAC

TGTTGATATAGCTATTTTCTCTTTACATATTGCTGGTGCTTCTTCAATTCTAGGAGCTATTAATTTTATT

ACGACTATTATTAATATACGTTTTTATTCACAAAAATTAGAACAAAGTTCATTATTTGTTTGATCTGTTT

TAATTACAGCTATTTTACTTTTATTATCATTACCTGTGCTTGCTGGTGGTATTACTATGTTGTTATTAGA

TCGGAATTTTAACAGTTCTTTTTTTGACCCAGCTGGGGGTGGAGATCCTATTTTGTTTCAACAC

>lcl|EF620380.1_cds_ABV25049.1_1 [gene=COI] [protein=cytochrome oxidase subunit I] [frame=3] [protein_id=ABV25049.1] [location=<1..>626] [gbkey=CDS]

TCTGCCTCTGTTGGTTCCAGTTTAAGTTTTATTATTCGTACAGAGTTGTCCCAACCTGGGATTTGGCTTG

GTGATGAACATTTATATAATGTATTAGTTACTTCTCATGCTCTTATTATGATTTTTTTCATGGTTATACC

TATTTTAATTGGGGGGTTTGGTAATTGGTTAATTCCTATTATAATTGGGGCTCCTGATATGTCATTTCCT

CGAATAAATAATTTAAGTTTTTGATTATTACCCCCCTCCCTTATTTTATTATTAGTTTCTTCTAATGTTA

GTTCAGGTGTAGGTTCAGGTTGAACTATATACCCCCCATTATCTGAATTTATTGGGCATTCAAATTTTAC

TGTTGATATAGCTATTTTCTCTTTACATATTGCTGGTGCTTCTTCAATTCTAGGAGCTATTAATTTTATT

ACGACTATTATTAATATACGTTTTTATTCACAAAAATTAGAACAAAGTTCATTATTTGTTTGATCTGTTT

TAATTACAGCTATTTTACTTTTATTATCATTACCTGTGCTTGCTGGTGGTATTACTATGTTGTTATTAGA

TCGGAATTTTAACAGTTCTTTTTTTGACCCAGCTGGGGGTGGAGATCCTATTTTGTTTCAACAC

>lcl|EF620379.1_cds_ABV25048.1_1 [gene=COI] [protein=cytochrome oxidase subunit I] [frame=3] [protein_id=ABV25048.1] [location=<1..>626] [gbkey=CDS]

TCTGCCTCTGTTGGTTCCAGTTTAAGTTTTATTATTCGTACAGAGTTGTCCCAACCTGGGATTTGGCTTG

GTGATGAACATTTATATAATGTATTAGTTACTTCTCATGCTCTTATTATGATTTTTTTCATGGTTATACC

TATTTTAATTGGGGGGTTTGGTAATTGGTTAATTCCTATTATAATTGGGGCTCCTGATATGTCATTTCCT

CGAATAAATAATTTAAGTTTTTGATTATTACCCCCCTCCCTTATTTTATTATTAGTTTCTTCTAATGTTA

GTTCAGGTGTAGGTTCAGGTTGAACTATATACCCCCCATTATCTGAATTTATTGGGCATTCAAATTTTAC

TGTTGATATAGCTATTTTCTCTTTACATATTGCTGGTGCTTCTTCAATTCTAGGAGCTATTAATTTTATT

ACGACTATTATTAATATACGTTTTTATTCACAAAAATTAGAACAAAGTTCATTATTTGTTTGATCTGTTT

TAATTACAGCTATTTTACTTTTATTATCATTACCTGTGCTTGCTGGTGGTATTACTATGTTGTTATTAGA

TCGGAATTTTAACAGTTCTTTTTTTGACCCAGCTGGGGGTGGAGATCCTATTTTGTTTCAACAC

>lcl|EF620378.1_cds_ABV25047.1_1 [gene=COI] [protein=cytochrome oxidase subunit I] [frame=3] [protein_id=ABV25047.1] [location=<1..>626] [gbkey=CDS]

TCTGCCTCTGTTGGTTCCAGTTTAAGTTTTATTATTCGTACAGAGTTGTCCCAACCTGGGATTTGGCTTG

GTGATGAACATTTATATAATGTATTAGTTACTTCTCATGCTCTTATTATGATTTTTTTCATGGTTATACC

TATTTTAATTGGGGGGTTTGGTAATTGGTTAATTCCTATTATAATTGGGGCTCCTGATATGTCATTTCCT

CGAATAAATAATTTAAGTTTTTGATTATTACCCCCCTCCCTTATTTTATTATTAGTTTCTTCTAATGTTA

GTTCAGGTGTAGGTTCAGGTTGAACTATATACCCCCCATTATCTGAATTTATTGGGCATTCAAATTTTAC

TGTTGATATAGCTATTTTCTCTTTACATATTGCTGGTGCTTCTTCAATTCTAGGAGCTATTAATTTTATT

ACGACTATTATTAATATACGTTTTTATTCACAAAAATTAGAACAAAGTTCATTATTTGTTTGATCTGTTT

TAATTACAGCTATTTTACTTTTATTATCATTACCTGTGCTTGCTGGTGGTATTACTATGTTGTTATTAGA

TCGGAATTTTAACAGTTCTTTTTTTGACCCAGCTGGGGGTGGAGATCCTATTTTGTTTCAACAC

>lcl|EF620377.1_cds_ABV25046.1_1 [gene=COI] [protein=cytochrome oxidase subunit I] [frame=3] [protein_id=ABV25046.1] [location=<1..>626] [gbkey=CDS]

TCTGCCTCTGTTGGTTCCAGTTTAAGTTTTATTATTCGTACAGAGTTGTCCCAACCTGGGATTTGGCTTG

GTGATGAACATTTATATAATGTATTAGTTACTTCTCATGCTCTTATTATGATTTTTTTCATGGTTATACC

TATTTTAATTGGGGGGTTTGGTAATTGGTTAATTCCTATTATAATTGGGGCTCCTGATATGTCATTTCCT

CGAATAAATAATTTAAGTTTTTGATTATTACCCCCCTCCCTTATTTTATTATTAGTTTCTTCTAATGTTA

GTTCAGGTGTAGGTTCAGGTTGAACTATATACCCCCCATTATCTGAATTTATTGGGCATTCAAATTTTAC

TGTTGATATAGCTATTTTCTCTTTACATATTGCTGGTGCTTCTTCAATTCTAGGAGCTATTAATTTTATT

ACGACTATTATTAATATACGTTTTTATTCACAAAAATTAGAACAAAGTTCATTATTTGTTTGATCTGTTT

TAATTACAGCTATTTTACTTTTATTATCATTACCTGTGCTTGCTGGTGGTATTACTATGTTGTTATTAGA

TCGGAATTTTAACAGTTCTTTTTTTGACCCAGCTGGGGGTGGAGATCCTATTTTGTTTCAACAC

>lcl|EF620376.1_cds_ABV25045.1_1 [gene=COI] [protein=cytochrome oxidase subunit I] [frame=3] [protein_id=ABV25045.1] [location=<1..>626] [gbkey=CDS]

TCTGCCTCTGTTGGTTCCAGTTTAAGTTTTATTATTCGTACAGAGTTGTCTCAACCTGGGATTTGGCTTG

GTGATGAACATTTATATAATGTATTAGTTACTTCTCATGCTCTTATTATGATTTTTTTCATGGTTATACC

TGTTTTAATTGGGGGGTTTGGTAATTGGTTAATTCCTATTATAATTGGGGCTCCTGATATGTCATTTCCT

CGAATAAATAATTTAAGTTTTTGATTATTACCTCCCTCCCTTATTTTATTATTAGTTTCTTCTAATGTTA

GTTCAGGTGTAGGTTCAGGTTGAACTATATACCCCCCATTATCTGAATTTATTGGGCATTCAAATTTTAC

TGTTGATATAGCTATTTTTTCTTTACATATTGCTGGTGCTTCTTCAATTTTAGGAGCTATTAATTTTATT

ACGACTATTATTAATATACGTTTTTATTCACAAAAATTAGAACAAAGTTCATTATTTGTTTGATCTGTTT

TAATTACAGCTATTTTACTTTTATTATCATTACCTGTGCTTGCTGGTGGTATTACTATGTTGTTATTAGA

TCGGAATTTTAACAGTTCTTTTTTTGATCCAGCTGGGGGTGGAGATCCTATTTTGTTTCAACAC

>lcl|EF620375.1_cds_ABV25044.1_1 [gene=COI] [protein=cytochrome oxidase subunit I] [frame=3] [protein_id=ABV25044.1] [location=<1..>626] [gbkey=CDS]

TCTGCCTCTGTTGGTTCCAGTTTAAGTTTTATTATTCGTACAGAGTTGTCTCAACCTGGGATTTGGCTTG

GTGATGAACATTTATATAATGTATTAGTTACTTCTCATGCTCTTATTATGATTTTTTTCATGGTTATACC

TGTTTTAATTGGGGGGTTTGGTAATTGGTTAATTCCTATTATAATTGGGGCTCCTGATATGTCATTTCCT

CGAATAAATAATTTAAGTTTTTGATTATTACCTCCCTCCCTTATTTTATTATTAGTTTCTTCTAATGTTA

GTTCAGGTGTAGGTTCAGGTTGAACTATATACCCCCCATTATCTGAATTTATTGGGCATTCAAATTTTAC

TGTTGATATAGCTATTTTTTCTTTACATATTGCTGGTGCTTCTTCAATTTTAGGAGCTATTAATTTTATT

ACGACTATTATTAATATACGTTTTTATTCACAAAAATTAGAACAAAGTTCATTATTTGTTTGATCTGTTT

TAATTACAGCTATTTTACTTTTATTATCATTACCTGTGCTTGCTGGTGGTATTACTATGTTGTTATTAGA

TCGGAATTTTAACAGTTCTTTTTTTGATCCAGCTGGGGGTGGAGATCCTATTTTGTTTCAACAC

>lcl|EF620374.1_cds_ABV25043.1_1 [gene=COI] [protein=cytochrome oxidase subunit I] [frame=3] [protein_id=ABV25043.1] [location=<1..>626] [gbkey=CDS]

TCTGCCTCTGTTGGTTCCAGTTTAAGTTTTATTATTCGTACAGAGTTGTCCCAACCTGGGATTTGGCTTG

GTGATGAACATTTATATAATGTATTAGTTACTTCTCATGCTCTTATTATGATTTTTTTCATGGTTATACC

TATTTTAATTGGGGGGTTTGGTAATTGGTTAATTCCTATTATAATTGGGGCCCCCGATATGTCATTTCCT

CGAATAAATAATTTAAGTTTTTGATTATTACCCCCCTCCCTTATTTTATTATTAGTTTCTTCTAATGTTA

GTTCAGGTGTAGGTTCAGGTTGAACTATATACCCCCCATTATCTGAATTTATTGGGCATTCAAATTTTAC

TGTTGATATAGCTATTTTCTCTTTACATATTGCTGGTGCTTCTTCAATTCTAGGAGCTATTAATTTTATT

ACGACTATTATTAATATACGTTTTTATTCACAAAAATTAGAACAAAGTTCATTATTTGTTTGATCTGTTT

TAATTACAGCTATTTTACTTTTATTATCATTACCTGTGCTTGCTGGTGGTATTACTATGTTGTTATTAGA

TCGGAATTTTAACAGTTCTTTTTTTGACCCAGCTGGGGGTGGAGATCCTATTTTGTTTCAACAC

>lcl|EF620373.1_cds_ABV25042.1_1 [gene=COI] [protein=cytochrome oxidase subunit I] [frame=3] [protein_id=ABV25042.1] [location=<1..>626] [gbkey=CDS]

TCTGCCTCTGTTGGTTCCAGTTTAAGTTTTATTATTCGTACAGAGTTGTCCCAACCTGGGATTTGGCTTG

GTGATGAACATTTATATAATGTATTAGTTACTTCTCATGCTCTTATTATGATTTTTTTCATGGTCATACC

TATTTTAATTGGGGGGTTTGGTAATTGGTTAATTCCTATTATAATTGGGGCTCCTGATATGTCATTTCCT

CGAATAAATAATTTAAGTTTTTGATTATTACCCCCCTCCCTTATTTTATTATTAGTTTCTTCTAATGTTA

GTTCAGGTGTAGGTTCAGGTTGAACTATATACCCCCCATTATCTGAATTTATTGGGCATTCAAATTTTAC

TGTTGATATAGCTATTTTTTCTTTACATATTGCTGGTGTTTCTTCAATTTTAGGAGCTATTAATTTTATT

ACGACTATTATTAATATACGTTTTTATTCACAAAAATTAGAACAAAGTTCATTATTTGTTTGATCTGTTT

TAATTACAGCTATTTTACTTTTATTATCATTACCTGTGCTTGCTGGTGGTATTACTATGTTGTTATTAGA

TCGGAATTTTAACAGTTCTTTTTTTGATCCAGCTGGGGGTGGAGATCCTATTTTGTTTCAACAC

>lcl|EF620372.1_cds_ABV25041.1_1 [gene=COI] [protein=cytochrome oxidase subunit I] [frame=3] [protein_id=ABV25041.1] [location=<1..>626] [gbkey=CDS]

TCTGCCTCTGTTGGTTCCAGTTTAAGTTTTATTATTCGTACAGAGTTGTCCCAACCTGGGATTTGGCTTG

GTGATGAACATTTATATAATGTATTAGTTACTTCTCATGCTCTTATTATGATTTTTTTCATGGTTATACC

TATTTTAATTGGGGGGTTTGGTAATTGGTTAATTCCTATTATAATTGGGGCTCCTGATATGTCATTTCCT

CGAATAAATAATTTAAGTTTTTGATTATTACCCCCCTCCCTCATTTTATTATTAGTTTCTTCTAATGTTA

GTTCAGGTGTAGGTTCAGGTTGAACTATATACCCCCCACTATCTGAATTTATTGGGCATTCAAATTTTAC

TGTTGATATAGCTATTTTCTCTTTACATATTGCTGGTGCTTCTTCAATTCTAGGAGCTATTAATTTTATT

ACGACTATTATTAATATACGTTTTTATTCACAAAAATTAGAACAAAGTTCATTATTTGTTTGATCTGTTT

TAATTACAGCTATTTTACTTTTATTATCATTACCTGTGCTTGCTGGTGGTATTACTATGTTGTTATTAGA

TCGGAATTTTAACAGTTCTTTTTTTGACCCAGCTGGGGGTGGAGATCCTATTTTGTTTCAACAC

>lcl|EF620371.1_cds_ABV25040.1_1 [gene=COI] [protein=cytochrome oxidase subunit I] [frame=3] [protein_id=ABV25040.1] [location=<1..>626] [gbkey=CDS]

TCTGCCTCTGTTGGTTCCAGTTTAAGTTTTATTATTCGTACAGAGTTGTCCCAACCTGGGATTTGGCTTG

GTGATGAACATTTATATAATGTATTAGTTACTTCTCATGCTCTTATTATGATTTTTTTCATGGTTATACC

TATTTTAATTGGGGGGTTTGGTAATTGGTTAATTCCTATTATAATTGGGGCTCCTGATATGTCATTTCCT

CGAATAAATAATTTAAGTTTTTGATTATTACCCCCTTCCCTTATTTTATTATTAGTTTCTTCTAATGTTA

GTTCAGGTGTAGGTTCAGGTTGAACTATATACCCCCCATTATCTGAATTTATTGGGCATTCAAATTTTAC

TGTTGATATAGCTATTTTCTCTTTACATATTGCTGGTGCTTCTTCAATTCTAGGGGCTATTAATTTTATT

ACGACTATTATTAATATACGTTTTTATTCACAAAAATTAGAACAAAGTTCATTATTTGTTTGATCTGTTT

TAATTACAGCTATTTTACTTTTATTATCATTACCTGTGCTTGCTGGTGGTATTACTATGTTGTTATTAGA

TCGGAATTTTAACAGTTCTTTTTTTGACCCAGCTGGGGGTGGAGATCCTATTTTGTTTCAACAC

>lcl|EF620370.1_cds_ABV25039.1_1 [gene=COI] [protein=cytochrome oxidase subunit I] [frame=3] [protein_id=ABV25039.1] [location=<1..>626] [gbkey=CDS]

TCTGCCTCTGTTGGTTCCAGTTTAAGTTTTATTATTCGTACAGAGTTGTCCCAACCTGGGATTTGGCTTG

GTGATGAACATTTATATAATGTATTAGTTACTTCTCATGCTTTTATTATGATTTTTTTCATGGTTATACC

TATTTTAATTGGGGGGTTTGGTAATTGGTTAATTCCTATTATAATTGGGGCTCCTGATATGTCATTTCCT

CGAATAAATAATTTAAGTTTTTGATTATTACCCCCCTCCCTTATTTTATTATTAGTTTCTTCTAATGTTA

GTTCAGGTGTAGGTTCAGGTTGAACTATATACCCCCCATTATCTGAATTTATTGGGCATTCAAATTTTAC

TGTTGATATAGCTATTTTCTCTTTACATATTGCTGGTGCTTCTTCAATTCTAGGAGCTATTAATTTTATT

ACGACTATTATTAATATACGTTTTTATTCACAAAAATTAGAACAAAGTTCATTATTTGTTTGATCTGTTT

TAATTACAGCTATTTTACTTTTATTATCATTACCTGTGCTTGCTGGTGGTATTACTATGTTGTTATTAGA

TCGGAATTTTAACAGTTCTTTTTTTGACCCAGCTGGGGGTGGAGATCCTATTTTGTTTCAACAC

>lcl|EF620369.1_cds_ABV25038.1_1 [gene=COI] [protein=cytochrome oxidase subunit I] [frame=3] [protein_id=ABV25038.1] [location=<1..>626] [gbkey=CDS]

TCTGCCTCTGTTGGTTCCAGTTTAAGTTTTATTATTCGTACAGAGTTGTCCCAACCTGGGATTTGGCTTG

GTGATGAACATTTATATAATGTATTAGTTACTTCTCATGCTCTTATTATGATTTTTTTCATGGTTATACC

TATTTTAATTGGGGGGTTTGGTAATTGGTTAATTCCTATTATAATTGGGGCTCCCGATATGTCATTTCCT

CGAATAAATAATTTAAGTTTTTGATTATTACCCCCCTCCCTTATTTTATTATTAGTTTCTTCTAATGTTA

GTTCAGGTGTAGGTTCAGGTTGAACTATATACCCCCCATTATCTGAATTTATTGGGCATTCAAATTTTAC

TGTTGATATAGCTATTTTTTCTTTACATATTGCTGGTGTTTCTTCAATTTTAGGAGCTATTAATTTTATT

ACGACTATTATTAATATACGTTTTTATTCACAAAAATTAGAACAAAGTTCATTATTTGTTTGATCTGTTT

TAATTACAGCTATTTTACTTTTATTATCATTACCTGTGCTTGCTGGTGGTATTACTATGTTGTTATTAGA

TCGGAATTTTAACAGTTCTTTTTTTGATCCAGCTGGGGGTGGAGATCCTATTTTGTTTCAACAC

>lcl|EF620368.1_cds_ABV25037.1_1 [gene=COI] [protein=cytochrome oxidase subunit I] [frame=3] [protein_id=ABV25037.1] [location=<1..>626] [gbkey=CDS]

TCTGCCTCTGTTGGTTCCAGTTTAAGTTTTATTATTCGTACAGAGTTGTCCCAACCTGGGATTTGGCTTG

GTGATGAACATTTATATAATGTATTAGTTACTTCTCATGCTCTTATTATGATTTTTTTCATGGTTATACC

TATTTTAATTGGGGGGTTTGGTAATTGGTTAATTCCTATTATAATTGGGGCTCCTGATATGTCATTTCCT

CGAATAAATAATTTAAGTTTTTGATTATTACCCCCCTCCCTTATTTTATTATTAGTTTCTTCTAATGTTA

GTTCAGGTGTAGGTTCAGGTTGAACTATATACCCCCCATTATCTGAATTTATTGGGCATTCAAATTTTAC

TGTTGATATAGCTATTTTTTCTTTACATATTGCTGGTGTTTCTTCAATTTTAGGAGCTATTAATTTTATT

ACGACTATTATTAATATACGTTTTTATTCACAAAAATTAGAACAAAGTTCATTATTTGTTTGATCTGTTT

TAATTACAGCTATTTTACTTTTATTATCATTACCTGTGCTTGCTGGTGGTATTACTATGTTGTTATTAGA

TCGGAATTTTAACAGTTCTTTTTTTGATCCAGCTGGGGGTGGAGATCCTATTTTGTTTCAACAC

>lcl|EF620367.1_cds_ABV25036.1_1 [gene=COI] [protein=cytochrome oxidase subunit I] [frame=3] [protein_id=ABV25036.1] [location=<1..>626] [gbkey=CDS]

TCTGCTTCTGTTGGTTCTAGTTTAAGTTTTATTATTCGTACAGAGTTATCACAACCTGGAATTTGACTTG

GTGATGAACATTTATATAATGTTTTAGTTACTTCTCATGCTCTTATTATAATTTTTTTTATAGTTATACC

TATTTTAATTGGTGGATTTGGTAATTGATTAATCCCTATTATAATTGGAGCCCCTGACATATCTTTCCCT

CGAATAAATAATTTAAGTTTTTGATTATTACCCCCCTCCCTTATTTTATTATTAGTCTCATCTAATGTTA

GCTCAGGTGTTGGATCAGGTTGAACTATATATCCCCCCTTATCTGAATTTATTGGTCATTCAAATTTTAC

TGTTGATATGGCTATTTTTTCTTTACATATTGCTGGTGCTTCTTCAATTTTGGGAGCTATTAATTTTATC

ACTACTATTATTAACATACGTTTTTATTCTCAAAAATTAGAACAAAGTTCATTGTTTGTTTGATCTGTTT

TAATTACAGCTATTTTACTTTTATTATCATTACCTGTGCTTGCTGGGGGTATTACTATATTATTGTTAGA

TCGAAATTTTAATAGTTCTTTTTTTGATCCAGCAGGAGGTGGAGACCCAATTTTGTTTCAACAC

>lcl|KX129796.1_cds_ANN23986.1_1 [gene=COI] [protein=cytochrome oxidase subunit 1] [protein_id=ANN23986.1] [location=<1..>763] [gbkey=CDS]

TTTTTTTTTGGATTATGAGCAGCTACGGTAGGTACATCACTTAGAATAATCATTCGATTAGAGCTAAGAC

AACCTGGAAGATTATTTAATGACGAACAATTCTATAATGTAGTTGTAACTAGACACGCATTTATTATAAT

TTTTTTTTTTGTTATACCTATTCTGATCGGTGGATTTGGTAACTGACTAGTTCCACTTATACTAAATGCA

CCTGACATAGCATTTCCCCGAATAAATAACCTAAGATTTTGATTACTTCCTCCATCTTTAATTTTAATTT

TATCTAGTTCAATCGTAGAACAGGGTGCAGGCACCGGATGAACTGTTTATCCGCCCCTATCAAGATTTTT

TGCGCATAGAGGACCTAGAGTCGACATAACCATTTTTTCCCTTCATGTAGCTGGAGCTTCCTCAATTCTT

GGGGCTATCAACTTTATTACAACTATTTTAAACATACGAATACATAATATGACAATAGAACTACTACCCC

TATTTGTATGATCAGTTCTTCTTACTGCTATTTTATTGCTCTTATCCCTCCCTGTACTTGCAGGTGCAAT

CACTATATTACTTTTAGATCGAAATTTTAACACCTCCTTTTTCGACCCAAGAGGAGGAGGAGACCCTATT

CTATACCAACACTTATTTTGATTCTTCGGTCATCCCGAAGTCTATATTTTAATTCTTCCTGGGTTTGGAA

TTATTTCACAACTAATTATCCATTTCAGTGGAAAACATTTAACTTTCGGGCATATCGGAATGA

>lcl|KT901834.1_cds_ALR96406.1_1 [gene=COI] [protein=cytochrome c oxidase subunit I] [frame=3] [protein_id=ALR96406.1] [location=<1..>639] [gbkey=CDS]

TGTGCCACAGTTGGAACTTCACTAAGTATACTTATTCGTTCTGAATTAAGACAACCCGGTACTTTAATTG

GTGATGAACAGATTTACAATGTAACAGTTACAAGTCATGCTTTTATTATAATTTTTTTTTTTGTTATGCC

TATCCTAATTGGGGGTTTTGGAAACTGATTAGTGCCTTTAATAATTGGGGCCCCCGATATGGCTTTTCCT

CGTATAAATAATTTAAGTTTCTGATTATTACCACCATCTTTCTTTTTAATTTCAACAAGCACTATAAGAG

AACAAGGAGCAGGAACTGGGTGAACTGTTTACCCCCCCTTATCTCATTACTTTGCCCATAGAGGGCCAGC

TGTAGATTTAACAATTTTTTCTCTTCATCTTGCTGGGGTATCTTCGATCTTGGGTGCAGTAAACTTTATT

TCAACTATTATTAACATACGAACACTTTCTATAAGTTTTGAAAACATACCTTTATTTGTGTGATCCGTTT

TAATCACGGCTGTGCTTTTACTTTTAGCCCTGCCTGTTTTAGCTGGTGCAATTACCATACTACTTCTTGA

TCGTAATTTTAACACTTCTTTTTTTGACCCTGCAGGAGGGGGAGACCCTATTTTGTATCAACATCTTTTT

TGATTTT

>lcl|KT901833.1_cds_ALR96405.1_1 [gene=COI] [protein=cytochrome c oxidase subunit I] [frame=3] [protein_id=ALR96405.1] [location=<1..>639] [gbkey=CDS]

TGTGCCACAGTTGGAACTTCATTAAGTATACTTATTCGTTCTGAATTAAGACAACCCGGTACTTTAATTG

GTGATGAACAGATTTATAATGTAACAGTTACAAGTCATGCTTTTATTATAATTTTTTTTTTTGTTATGCC

TATCCTAATTGGGGGTTTTGGAAACTGATTAGTGCCTTTAATAATTGGGGCCCCCGATATGGCTTTTCCT

CGTATAAATAATTTAAGTTTCTGATTATTACCACCATCTTTCTTTTTAATTTCAACAAGCACTATAAGAG

AACAAGGAGCAGGAACTGGGTGAACTGTTTACCCCCCCTTATCTCATTACTTTGCCCATAGAGGGCCAGC

TGTAGATTTAACAATTTTTTCTCTTCATCTTGCTGGGGTATCTTCGATCTTGGGTGCAGTAAACTTTATT

TCAACTATTATTAACATACGAACACTTTCTATAAGTTTTGAAAACATACCTTTATTTGTGTGATCCGTTT

TAATCACGGCTGTGCTTTTACTTTTAGCCCTGCCTGTTTTAGCTGGTGCAATTACCATACTACTTCTTGA

TCGTAATTTTAACACTTCTTTTTTTGACCCTGCAGGAGGGGGAGACCCTATTTTGTATCAACATCTTTTT

TGATTTT

>lcl|KT901832.1_cds_ALR96404.1_1 [gene=COI] [protein=cytochrome c oxidase subunit I] [frame=3] [protein_id=ALR96404.1] [location=<1..>639] [gbkey=CDS]

TGTGCCACAGTTGGAACTTCACTAAGTATACTTATTCGTTCTGAATTAAGACAACCCGGTACTTTAATTG

GTGATGAACAGATTTATAATGTAACAGTTACAAGTCATGCTTTTATTATAATTTTTTTTTTTGTTATGCC

TATCCTAATTGGGGGTTTTGGAAACTGATTAGTGCCTTTAATAATTGGGGCCCCCGATATGGCTTTTCCT

CGTATAAATAATTTAAGTTTCTGATTATTACCACCATCTTTCTTTTTAATTTCAACAAGCACTATAAGAG

AACAAGGAGCAGGAACTGGGTGAACTGTTTACCCCCCCTTATCTCATTACTTTGCCCATAGAGGGCCAGC

TGTAGATTTAACAATTTTTTCTCTTCATCTTGCTGGGGTATCTTCGATCTTGGGTGCAGTAAACTTTATT

TCAACTATTATTAACATACGAACACTTTCTATAAGTTTTGAAAACATACCTTTATTTGTGTGATCCGTTT

TAATCACGGCTGTGCTTTTACTTTTAGCCCTGCCTGTTTTAGCTGGTGCAATTACCATACTACTTCTTGA

TCGTAATTTTAACACTTCTTTTTTTGACCCTGCAGGAGGGGGAGACCCTATTTTGTATCAACATCTTTTT

TGATTTT

>lcl|KT901831.1_cds_ALR96403.1_1 [gene=COI] [protein=cytochrome c oxidase subunit I] [frame=3] [protein_id=ALR96403.1] [location=<1..>639] [gbkey=CDS]

TGTGCCACAGTTGGAACTTCACTAAGTATACTTATTCGTTCTGAATTAAGACAACCCGGTACTTTAATTG

GTGATGAACAGATTTATAATGTAACAGTTACAAGTCATGCTTTTATTATAATTTTTTTTTTTGTTATGCC

TATCCTAATTGGGGGTTTTGGAAACTGATTAGTGCCTTTAATAATTGGGGCCCCCGATATGGCTTTTCCT

CGTATAAATAATTTAAGTTTCTGATTATTACCACCATCTTTCTTTTTAATTTCAACAAGCACTATAAGAG

AACAAGGAGCAGGAACTGGGTGAACTGTTTACCCCCCCTTATCTCATTACTTTGCCCATAGAGGGCCAGC

TGTAGATTTAACAATTTTTTCTCTTCATCTTGCTGGGGTATCTTCGATCTTGGGTGCAGTAAACTTTATT

TCAACTATTATTAACATACGAACACTTTCTATAAGTTTTGAAAACATACCTTTATTTGTGTGATCCGTTT

TAATCACGGCTGTGCTTTTACTTTTAGCCCTGCCTGTTTTAGCTGGTGCAATTACCATACTACTTCTTGA

TCGTAATTTTAACACTTCTTTTTTTGACCCTGCAGGAGGGGGAGACCCTATTTTGTATCAACATCTTTTT

TGATTTT

>lcl|KC193576.1_cds_AGW25085.1_1 [gene=COI] [protein=cytochrome c oxidase subunit 1] [protein_id=AGW25085.1] [location=<1..>624] [gbkey=CDS]

CTATGAACTGCTTGTGTGGGTACATCCTTAAGATTCTTAATTCGTAGCGAACTGAGACAACCAGGATTAC

TATTTGCAGATGAACAAATATATAATGTTATTGTTACTAGTCATGCCTTTATTATAATTTTTTTCTTCGT

CATACCAATTTTAATTGGGGGATTTGGAAATTGACTAATCCCTTTAATAATTGGAGCTCCCGATATAGCT

TTTCCTCGTATAAATAATCTAAGTTTTTGAATACTCCCACCTTCCTTCATCCTTATCACTACAAGTAGAT

TAACCGAACAAGGCGCCGGTACAGGGTGAACGGTATACCCCCCATTATCTCACTTTTTTGCCCACAGGGG

GGGTGCTGTAGATTTAACAATTTTCTCGCTCCATATTGCGGGTATTTCATCCATTTTAGGAGCCATTAAC

TTTATTTCTACAATTATCAATATGCGAACTCCCTACATAAGATTAGAAAAGATACCCCTATTTGTATGAT

CAGTTTTTCTAACTGCTATTTTACTTCTTCTAGCACTACCAGTTTTAGCGGGGGGGATTACAATACTTTT

ACTTGATCGAAATTTTAATACATCTTTTTTTGACCCTGCGGGGGGAGGAGACCCTATTTTATAC

>lcl|KC193575.1_cds_AGW25084.1_1 [gene=COI] [protein=cytochrome c oxidase subunit 1] [protein_id=AGW25084.1] [location=<1..>624] [gbkey=CDS]

CTATGAACTGCTTGTGTGGGTACATCCTTAAGATTCTTAATTCGTAGCGAACTGAGACAACCAGGATTAC

TATTTGCAGATGAACAAATATATAATGTTATTGTTACTAGTCATGCCTTTATTATAATTTTTTTCTTCGT

CATACCAATTTTAATTGGGGGATTTGGAAATTGACTAATCCCTTTAATAATTGGAGCTCCCGATATAGCT

TTTCCTCGTATAAATAATCTAAGTTTTTGAATACTCCCACCTTCCTTCATCCTTATCACTACAAGTAGAT

TAACCGAACAAGGCGCCGGTACAGGGTGAACGGTATACCCCCCATTATCTCACTTTTTTGCCCACAGGGG

GGGTGCTGTAGATTTAACAATTTTCTCGCTCCATATTGCGGGTATTTCATCCATTTTAGGAGCCATTAAC

TTTATTTCTACAATTATCAATATGCGAACTCCCTACATAAGATTAGAAAAGATACCCCTATTTGTATGAT

CAGTTTTTCTAACTGCTATTTTACTTCTTCTAGCACTACCAGTTTTAGCGGGGGGGATTACAATACTTTT

ACTTGATCGAAATTTTAATACATCTTTTTTTGACCCTGCGGGGGGAGGAGACCCTATTTTATAC

>lcl|KC193574.1_cds_AGW25083.1_1 [gene=COI] [protein=cytochrome c oxidase subunit 1] [frame=3] [protein_id=AGW25083.1] [location=<1..>608] [gbkey=CDS]

GGTACATCCTTAAGATTCTTAATTCGTAGCGAACTGAGACAACCAGGATTACTATTTGCAGATGAACAAA

TATATAATGTTATTGTTACTAGTCATGCCTTTATTATAATTTTTTTCTTCGTCATACCAATTTTAATTGG

GGGATTTGGAAATTGACTAATCCCTTTAATAATTGGAGCTCCCGATATAGCTTTTCCTCGTATAAATAAT

CTAAGTTTTTGAATACTCCCACCTTCCTTCATCCTTATCACTACAAGTAGATTAACCGAACAAGGCGCCG

GTACAGGGTGAACGGTATACCCCCCATTATCTCACTTTTTTGCCCACAGGGGGGGTGCTGTAGATTTAAC

AATTTTCTCGCTCCATATTGCGGGTATTTCATCCATTTTAGGAGCCATTAACTTTATTTCTACAATTATC

AATATGCGAACTCCCTACATAAGATTAGAAAAGATACCCCTATTTGTATGATCAGTTTTTCTAACTGCTA

TTTTACTTCTTCTAGCACTACCAGTTTTAGCGGGGGGGATTACAATACTTTTACTTGATCGAAATTTTAA

TACATCTTTTTTTGACCCTGCGGGGGGAGGAGACCCTATTTTATAC

>lcl|KC193573.1_cds_AGW25082.1_1 [gene=COI] [protein=cytochrome c oxidase subunit 1] [frame=2] [protein_id=AGW25082.1] [location=<1..>495] [gbkey=CDS]

TGTGTGGGTACATCCTTAAGATTCTTAATTCGTAGCGAACTGAGACAACCAGGATTACTATTTGCAGATG

AACAAATATATAATGTTATTGTTACTAGTCATGCCTTTATTATAATTTTTTTCTTCGTCATACCAATTTT

AATTGGAGGGTTTGGAAATTGACTAATCCCTTTAATAATTGGAGCTCCCGATATAGCTTTTCCTCGTATA

AATAATCTAAGTTTTTGAATGCTCCCACCATCCTTCATCCTTATCACTACAAGTAGATTAACCGAACAAG

GCGCCGGGACAGGGTGAACGGTATACCCCCCATTATCTCACTTTTTTGCCCACAGGGGGGGTGCTGTAGA

TTTAACAATTTTCTCGCTTCATATTGCGGGTATTTCATCCATTTTAGGGGCCATTAACTTTATTTNNNNA

ATTATCAATATGCGAACTCCCTACATAAGATTAGAAAAGATACCCCTATTTGTATGATCAGTTTTTCTAA

CTGC

>lcl|KC193572.1_cds_AGW25081.1_1 [gene=COI] [protein=cytochrome c oxidase subunit 1] [protein_id=AGW25081.1] [location=<1..>506] [gbkey=CDS]

CTATGAACTGCTTGTGTGGGTACATCCTTAAGATTCTTAATTCGTAGCGAACTGAGACAACCAGGATTAC

TATTTGCAGATGAACAAATATATAATGTTATTGTTACTAGTCATGCCTTTATTATAATTTTTTTCTTCGT

CATACCAATTTTAATTGGAGGGTTTGGAAATTGACTAATCCCTTTAATAATTGGAGCTCCCGATATAGCT

TTTCCTCGTATAAATAATCTAAGTTTTTGAATGCTCCCACCATCCTTCATCCTTATCACTACAAGTAGAT

TAACCGAACAAGGCGCCGGGACAGGGTGAACGGTATACCCCCCATTATCTCACTTTTTTGCCCACAGGGG

GGGTGCTGTAGATTTAACAATTTTCTCGCTTCATATTGCGGGTATTTCATCCATTTTAGGGGCCATTAAC

TTTATTTCTACAATTATCAATATGCGAACTCCCTACATAAGATTAGAAAAGATACCCCTATTTGTATGAT

CAGTTTTTCTAACTGC

>lcl|HQ876597.1_cds_ADW94987.1_1 [gene=COI] [protein=cytochrome oxidase subunit I] [protein_id=ADW94987.1] [location=<1..>519] [gbkey=CDS]

ACTAGTCATGCTTTTATCATAATTTTCTTTTTTGTAATACCAATTCTAATTGGAGGTTTTGGAAACTGAC

TAGTACCCCTAATAATCGGGGCCCCAGACATAGCTTTTCCCCGAATAAATAATATAAGATTTTGACTTCT

ACCCCCCTCGTTTACACTCATTATAACAAGCACAATAAGGGAACAAGGAGCAGGAACAGGCTGAACCGTA

TACCCGCCACTATCTCACTTCTTTGCACACAGAGGACCTAGAGTTGACCTAACCATTTTCTCCCTACATA

TTGCAGGTATCTCATCCATTCTAGGAGCCATCAACTTTATTACAACAATTATTAATATACGAACACCTAG

ACTATCACTTGAAAATATGCCTTTATTCGTTTGATCCGTTTTAATTACAGCCATTTTACTTCTCCTAGCT

CTCCCTGTATTAGCTGGAGGGATTACAATACTACTAATAGATCGAAATTTTAATACCTCATTTTTTGATC

CAGCTGGAGGGGGAGATCCTATTTTATAC

>lcl|HQ876596.1_cds_ADW94986.1_1 [gene=COI] [protein=cytochrome oxidase subunit I] [protein_id=ADW94986.1] [location=<1..>624] [gbkey=CDS]

CTCTGGGCAGCTTGCGTAGGTACCTCATTAAGATTTATTATTCGAAGAGAATTAAGTCAACCCGGAATCT

TATTCGGAGATGAACAAATATATAACGTTACTGTAACTAGTCATGCTTTTATCATAATTTTCTTTTTTGT

AATACCAATTCTAATTGGAGGTTTTGGAAACTGACTAGTACCCCTAATAATCGGGGCCCCAGACATAGCT

TTTCCCCGAATAAATAATATAAGATTTTGACTTCTACCCCCCTCGTTTACACTCATTATAACAAGCACAA

TAAGGGAACAAGGAGCAGGAACAGGCTGAACCGTATACCCGCCACTATCTCACTTCTTTGCACACAGAGG

ACCTAGAGTTGACCTAACCATTTTCTCCCTACATATTGCAGGTATCTCATCCATTCTAGGAGCCATCAAC

TTTATTACAACAATTATTAATATACGAACACCTAGACTATCACTTGAAAATATGCCTTTATTCGTTTGAT

CCGTTTTAATTACAGCCATTTTACTTCTCCTAGCTCTCCCTGTATTAGCTGGAGGGATTACAATACTACT

AATAGATCGAAATTTTAATACCTCATTTTTTGATCCAGCTGGAGGGGGAGATCCTATTTTATAC

>lcl|HQ876595.1_cds_ADW94985.1_1 [gene=COI] [protein=cytochrome oxidase subunit I] [frame=2] [protein_id=ADW94985.1] [location=<1..>577] [gbkey=CDS]

GAATTAAGTCAACCCGGAATCTTATTCGGAGATGAACAAATATATAACGTTACTGTAACTAGTCATGCTT

TTATCATAATTTTCTTTTTTGTAATACCAATTCTAATTGGAGGTTTTGGAAACTGACTAGTACCCCTAAT

AATCGGGGCCCCAGACATAGCTTTTCCCCGAATAAATAATATAAGATTTTGACTTCTACCCCCCTCGTTT

ACACTCATTATAACAAGCACAATAAGGGAACAAGGAGCAGGAACAGGCTGAACCGTATACCCGCCACTAT

CTCACTTCTTTGCACACAGAGGACCTAGAGTTGACCTAACCATTTTCTCCCTACATATTGCAGGTATCTC

ATCCATTCTAGGAGCCATCAACTTTATTACAACAATTATTAATATACGAACACCTAGACTATCACTTGAA

AATATGCCTTTATTCGTTTGATCCGTTTTAATTACAGCCATTTTACTTCTCCTAGCTCTCCCTGTATTAG

CTGGAGGGATTACAATACTACTAATAGATCGAAATTTTAATACCTCATTTTTTGATCCAGCTGGAGGGGG

AGATCCTATTTTATAC

>lcl|HQ876594.1_cds_ADW94984.1_1 [gene=COI] [protein=cytochrome oxidase subunit I] [protein_id=ADW94984.1] [location=<1..>624] [gbkey=CDS]

CTCTGGGCAGCTTGCGTAGGTACCTCATTAAGATTTATTATTCGAAGAGAATTAAGTCAACCCGGAATCT

TATTCGGAGATGAACAAATATATAACGTTACTGTAACTAGTCATGCTTTTATCATAATTTTCTTTTTTGT

AATACCAATTCTAATTGGAGGTTTTGGAAACTGACTAGTACCCCTAATAATCGGGGCCCCAGACATAGCT

TTTCCCCGAATAAATAATATAAGATTTTGACTTCTACCCCCCTCGTTTACACTCATTATAACAAGCACAA

TAAGGGAACAAGGAGCAGGAACAGGCTGAACCGTATACCCGCCACTATCTCACTTCTTTGCACACAGAGG

ACCTAGAGTTGACCTAACCATTTTCTCCCTACATATTGCAGGTATCTCATCCATTCTAGGAGCCATCAAC

TTTATTACAACAATTATTAATATACGAACACCTAGACTATCACTTGAAAATATGCCTTTATTCGTTTGAT

CCGTTTTAATTACAGCCATTTTACTTCTCCTAGCTCTCCCTGTATTAGCTGGAGGGATTACAATACTACT

AATAGATCGAAATTTTAATACCTCATTTTTTGATCCAGCTGGAGGGGGAGATCCTATTTTATAC

>lcl|HQ876593.1_cds_ADW94983.1_1 [gene=COI] [protein=cytochrome oxidase subunit I] [protein_id=ADW94983.1] [location=<1..>624] [gbkey=CDS]

CTCTGGGCAGCTTGCGTAGGTACCTCATTAAGATTTATTATTCGAAGAGAATTAAGTCAACCCGGAATCT

TATTCGGAGATGAACAAATATATAACGTTACTGTAACTAGTCATGCTTTTATCATAATTTTCTTTTTTGT

AATACCAATTCTAATTGGAGGTTTTGGAAACTGACTAGTACCCCTAATAATCGGGGCCCCAGACATAGCT

TTTCCCCGAATAAATAATATAAGATTTTGACTTCTACCCCCCTCGTTTACACTCATTATAACAAGCACAA

TAAGGGAACAAGGAGCAGGAACAGGCTGAACCGTATACCCGCCACTATCTCACTTCTTTGCACACAGAGG

ACCTAGAGTTGACCTAACCATTTTCTCCCTACATATTGCAGGTATCTCATCCATTCTAGGAGCCATCAAC

TTTATTACAACAATTATTAATATACGAACACCTAGACTATCACTTGAAAATATGCCTTTATTCGTTTGAT

CCGTTTTAATTACAGCCATTTTACTTCTCCTAGCTCTCCCTGTATTAGCTGGAGGGATTACAATACTACT

AATAGATCGAAATTTTAATACCTCATTTTTTGATCCAGCTGGAGGGGGAGATCCTATTTTATAC

>lcl|HQ876592.1_cds_ADW94982.1_1 [gene=COI] [protein=cytochrome oxidase subunit I] [protein_id=ADW94982.1] [location=<1..>624] [gbkey=CDS]

CTCTGGGCAGCTTGCGTAGGTACCTCATTAAGATTTATTATTCGAAGAGAATTAAGTCAACCCGGAATCT

TATTCGGAGATGAACAAATATATAACGTTACTGTAACTAGTCATGCTTTTATCATAATTTTCTTTTTTGT

AATACCAATTCTAATTGGAGGTTTTGGAAACTGACTAGTACCCCTAATAATCGGGGCCCCAGACATAGCT

TTTCCCCGAATAAATAATATAAGATTTTGACTTCTACCCCCCTCGTTTACACTCATTATAACAAGCACAA

TAAGGGAACAAGGAGCAGGAACAGGCTGAACCGTATACCCGCCACTATCTCACTTCTTTGCACACAGAGG

ACCTAGAGTTGACCTAACCATTTTCTCCCTACATATTGCAGGTATCTCATCCATTCTAGGAGCCATCAAC

TTTATTACAACAATTATTAATATACGAACACCTAGACTATCACTTGAAAATATGCCTTTATTCGTTTGAT

CCGTTTTAATTACAGCCATTTTACTTCTCCTAGCTCTCCCTGTATTAGCTGGAGGGATTACAATACTACT

AATAGATCGAAATTTTAATACCTCATTTTTTGATCCAGCTGGAGGGGGAGATCCTATTTTATAC

>lcl|HQ876591.1_cds_ADW94981.1_1 [gene=COI] [protein=cytochrome oxidase subunit I] [protein_id=ADW94981.1] [location=<1..>624] [gbkey=CDS]

CTCTGGGCAGCTTGCGTAGGTACCTCATTAAGATTTATTATTCGAAGAGAATTAAGTCAACCCGGAATCT

TATTCGGAGATGAACAAATATATAACGTTACTGTAACTAGTCATGCTTTTATCATAATTTTCTTTTTTGT

AATACCAATTCTAATTGGAGGTTTTGGAAACTGACTAGTACCCCTAATAATCGGGGCCCCAGACATAGCT

TTTCCCCGAATAAATAATATAAGATTTTGACTTCTACCCCCCTCGTTTACACTCATTATAACAAGCACAA

TAAGGGAACAAGGAGCAGGAACAGGCTGAACCGTATACCCGCCACTATCTCACTTCTTTGCACACAGAGG

ACCTAGAGTTGACCTAACCATTTTCTCCCTACATATTGCAGGTATCTCATCCATTCTAGGAGCCATCAAC

TTTATTACAACAATTATTAATATACGAACACCTAGACTATCACTTGAAAATATGCCTTTATTCGTTTGAT

CCGTTTTAATTACAGCCATTTTACTTCTCCTAGCTCTCCCTGTATTAGCTGGAGGGATTACAATACTACT

AATAGATCGAAATTTTAATACCTCATTTTTTGATCCAGCTGGAGGGGGAGATCCTATTTTATAC

>lcl|HQ876590.1_cds_ADW94980.1_1 [gene=COI] [protein=cytochrome oxidase subunit I] [protein_id=ADW94980.1] [location=<1..>624] [gbkey=CDS]

CTCTGGGCAGCTTGCGTAGGTACCTCATTAAGATTTATTATTCGAAGAGAATTAAGTCAACCCGGAATCT

TATTCGGAGATGAACAAATATATAACGTTACTGTAACTAGTCATGCTTTTATCATAATTTTCTTTTTTGT

AATACCAATTCTAATTGGAGGTTTTGGAAACTGACTAGTACCCCTAATAATCGGGGCCCCAGACATAGCT

TTTCCCCGAATAAATAATATAAGATTTTGACTTCTACCCCCCTCGTTTACACTCATTATAACAAGCACAA

TAAGGGAACAAGGAGCAGGAACAGGCTGAACCGTATACCCGCCACTATCTCACTTCTTTGCACACAGAGG

ACCTAGAGTTGACCTAACCATTTTCTCCCTACATATTGCAGGTATCTCATCCATTCTAGGAGCCATCAAC

TTTATTACAACAATTATTAATATACGAACACCTAGACTATCACTTGAAAATATGCCTTTATTCGTTTGAT

CCGTTTTAATTACAGCCATTTTACTTCTCCTAGCTCTCCCTGTATTAGCTGGAGGGATTACAATACTACT

AATAGATCGAAATTTTAATACCTCATTTTTTGATCCAGCTGGAGGGGGAGATCCTATTTTATAC

>lcl|HQ876589.1_cds_ADW94979.1_1 [gene=COI] [protein=cytochrome oxidase subunit I] [protein_id=ADW94979.1] [location=<1..>624] [gbkey=CDS]

CTCTGGGCAGCTTGCGTAGGTACCTCATTAAGATTTATTATTCGAAGAGAATTAAGTCAACCCGGAATCT

TATTCGGAGATGAACAAATATATAACGTTACTGTAACTAGTCATGCTTTTATCATAATTTTCTTTTTTGT

AATACCAATTCTAATTGGAGGTTTTGGAAACTGACTAGTACCCCTAATAATCGGGGCCCCAGACATAGCT

TTTCCCCGAATAAATAATATAAGATTTTGACTTCTACCCCCCTCGTTTACACTCATTATAACAAGCACAA

TAAGGGAACAAGGAGCAGGAACAGGCTGAACCGTATACCCGCCACTATCTCACTTCTTTGCACACAGAGG

ACCTAGAGTTGACCTAACCATTTTCTCCCTACATATTGCAGGTATCTCATCCATTCTAGGAGCCATCAAC

TTTATTACAACCATTATTAATATACGAACACCTAGACTATCACTTGAAAATATGCCTTTATTCGTTTGAT

CCGTTTTAATTACAGCCATTTTACTTCTCCTAGCTCTCCCTGTATTAGCTGGAGGGATTACAATACTACT

AATAGATCGAAATTTTAATACCTCATTTTTTGATCCAGCTGGAGGAGGAGATCCTATTTTATAC

>lcl|HQ876588.1_cds_ADW94978.1_1 [gene=COI] [protein=cytochrome oxidase subunit I] [protein_id=ADW94978.1] [location=<1..>624] [gbkey=CDS]

CTCTGGGCAGCTTGCGTAGGTACCTCATTAAGATTTATTATTCGAAGAGAATTAAGTCAACCCGGAATTT

TATTTGGAGATGAACAAATATATAATGTTACTGTAACTAGTCATGCTTTTATCATAATTTTCTTTTTTGT

AATACCAATTCTAATTGGAGGTTTTGGAAATTGACTAGTCCCTCTAATAATTGGTGCCCCGGACATAGCT

TTTCCCCGAATAAATAATATAAGATTTTGACTTCTACCCCCATCATTTACACTTATTATAACAAGCACAA

TAAGAGAACAGGGAGCAGGAACAGGCTGAACCGTGTACCCGCCACTCTCTCATTTTTTTGCACACAGAGG

ACCTAGAGTTGATCTAACTATTTTCTCTCTACATATTGCAGGTATTTCATCTATTTTAGGAGCCATTAAC

TTTATTACAACCATTATTAATATGCGAACACCTAGATTATCACTTGAAAACATACCTCTATTCGTTTGAT

CCGTTTTAATTACAGCCATTTTACTTCTACTAGCTCTACCCGTATTAGCTGGAGGAATTACAATACTCTT

AATAGATCGAAATTTTAATACCTCATTTTTTGATCCAGCTGGAGGGGGAGATCCTATTTTATAT

>lcl|HQ876587.1_cds_ADW94977.1_1 [gene=COI] [protein=cytochrome oxidase subunit I] [protein_id=ADW94977.1] [location=<1..>624] [gbkey=CDS]

CTCTGGGCAGCTTGCGTAGGTACCTCATTAAGATTTATTATTCGAAGAGAATTAAGTCAACCCGGAATTT

TATTTGGAGATGAACAAATATATAATGTTACTGTAACTAGTCATGCTTTTATCATAATTTTCTTTTTTGT

AATACCAATTCTAATTGGAGGTTTTGGAAATTGACTAGTCCCTCTAATAATTGGTGCCCCGGACATAGCT

TTTCCCCGAATAAATAATATAAGATTTTGACTTCTACCCCCATCATTTACACTTATTATAACAAGCACAA

TAAGAGAACAGGGAGCAGGAACAGGCTGAACCGTGTACCCGCCACTCTCTCATTTTTTTGCACACAGAGG

ACCTAGAGTTGATCTAACTATTTTCTCTCTACATATTGCAGGTATTTCATCTATTTTAGGAGCCATTAAC

TTTATTACAACCATTATTAATATGCGAACACCTAGATTATCACTTGAAAACATACCTCTATTCGTTTGAT

CCGTTTTAATTACAGCCATTTTACTTCTACTAGCTCTACCCGTATTAGCTGGAGGAATTACAATACTCTT

AATAGATCGAAATTTTAATACCTCATTTTTTGATCCAGCTGGAGGGGGAGATCCTATTTTATAT

>lcl|HQ876586.1_cds_ADW94976.1_1 [gene=COI] [protein=cytochrome oxidase subunit I] [protein_id=ADW94976.1] [location=<1..>624] [gbkey=CDS]

CTCTGGGCAGCTTGCGTAGGTACCTCATTAAGATTTATTATTCGAAGAGAATTAAGTCAACCCGGAATTT

TATTTGGAGATGAACAAATATATAATGTTACTGTAACTAGTCATGCTTTTATCATAATTTTCTTTTTTGT

AATACCAATTCTAATTGGAGGTTTTGGAAATTGACTAGTCCCTCTAATAATTGGTGCCCCGGACATAGCT

TTTCCCCGAATAAATAATATAAGATTTTGACTTCTACCCCCATCATTTACACTTATTATAACAAGCACAA

TAAGAGAACAGGGAGCAGGAACAGGCTGAACCGTGTACCCGCCACTCTCTCATTTTTTTGCACACAGAGG

ACCTAGAGTTGATCTAACTATTTTCTCTCTACATATTGCAGGTATTTCATCTATTTTAGGAGCCATTAAC

TTTATTACAACCATTATTAATATGCGAACACCTAGATTATCACTTGAAAACATACCTCTATTCGTTTGAT

CCGTTTTAATTACAGCCATTTTACTTCTTCTAGCTCTACCCGTATTAGCTGGAGGAATTACAATACTCTT

AATAGATCGAAATTTTAATACCTCATTTTTTGATCCAGCTGGAGGGGGAGATCCTATTTTATAT

>lcl|HQ876585.1_cds_ADW94975.1_1 [gene=COI] [protein=cytochrome oxidase subunit I] [frame=2] [protein_id=ADW94975.1] [location=<1..>592] [gbkey=CDS]

TTTATTATTCGAAGAGAATTAAGTCAACCCGGAATTTTATTTGGAGATGAACAAATATATAATGTTACTG

TAACTAGTCATGCTTTTATCATAATTTTCTTTTTTGTAATACCAATTCTAATTGGAGGTTTTGGAAATTG

ACTAGTCCCTCTAATAATTGGTGCCCCGGACATAGCTTTTCCCCGAATAAATAATATAAGATTTTGACTT

CTACCCCCATCATTTACACTTATTATAACAAGCACAATAAGAGAACAGGGAGCAGGAACAGGCTGAACCG

TGTACCCGCCACTCTCTCATTTTTTTGCACACAGAGGACCTAGAGTTGATCTAACTATTTTCTCTCTACA

TATTGCAGGTATTTCATCTATTTTAGGAGCCATTAACTTTATTACAACCATTATTAATATGCGAACACCT

AGATTATCACTTGAAAACATACCTCTATTCGTTTGATCCGTTTTAATTACAGCCATTTTACTTCTACTAG

CTCTACCCGTATTAGCTGGAGGAATTACAATACTCTTAATAGATCGAAATTTTAATACCTCATTTTTTGA

TCCAGCTGGAGGGGGAGATCCTATTTTATAT

>lcl|HQ876584.1_cds_ADW94974.1_1 [gene=COI] [protein=cytochrome oxidase subunit I] [protein_id=ADW94974.1] [location=<1..>624] [gbkey=CDS]

CTCTGGGCAGCTTGCGTAGGTACCTCATTAAGATTTATTATTCGAAGAGAATTAAGTCAACCCGGAATTT

TATTTGGAGATGAACAAATATATAATGTTACTGTAACTAGTCATGCTTTTATCATAATTTTCTTTTTTGT

AATACCAATTCTAATTGGAGGTTTTGGAAATTGACTAGTCCCTCTAATAATTGGTGCCCCGGACATAGCT

TTTCCCCGAATAAATAATATAAGATTTTGACTTCTACCCCCATCATTTACACTTATTATAACAAGCACAA

TAAGAGAACAGGGAGCAGGAACAGGCTGAACCGTGTACCCGCCACTCTCTCATTTTTTTGCACACAGAGG

ACCTAGAGTTGATCTAACTATTTTCTCTCTACATATTGCAGGTATTTCATCTATTTTAGGAGCCATTAAC

TTTATTACAACCATTATTAATATGCGAACACCTAGATTATCACTTGAAAACATACCTCTATTCGTTTGAT

CCGTTTTAATTACAGCCATTTTGCTTCTACTAGCTCTACCCGTATTAGCTGGAGGAATTACAATACTCTT

AATAGATCGAAATTTTAATACCTCATTTTTTGATCCAGCTGGAGGGGGAGATCCTATTTTATAT

>lcl|HQ876583.1_cds_ADW94973.1_1 [gene=COI] [protein=cytochrome oxidase subunit I] [protein_id=ADW94973.1] [location=<1..>624] [gbkey=CDS]

TTATGAGCTGCATGTGTTGGAACTTCTCTTAGATTTATTATTCGAAGAGAATTAAGACAACCTGGAATTC

TTTTTGGTGATGAACAAATATATAACGTAACTGTCACAAGTCATGCTTTTATTATAATTTTTTTTTTCGT

AATACCCATTCTTATTGGAGGATTTGGAAACTGATTAGTCCCTCTTATAATTGGTGCCCCAGACATGGCT

TTTCCTCGTATAAACAATTTAAGATTTTGACTTCTACCCCCCTCCTTTACTCTTATTATAACTAGAACTA

TAAGTGAACAAGGGGCAGGAACAGGATGAACCGTTTATCCACCTCTATCTCACTTCTTTGCTCATAGAGG

ACCTAGTGTAGACTTAACTATTTTTTCTCTTCATATTGCTGGAGTATCTTCTATTTTAGGAGCAATTAAC

TTTATTTCTACAATTATTAACATACGAGCCCCTAGAGTACACTTAGAAAATATACCTCTATTTGTATGAT

CAGTTCTTATCACAGCTATCCTACTTTTACTAGCACTTCCAGTTTTGGCAGGAGGAATTACTATACTTTT

AATAGACCGCAACTTTAACACTTCTTTCTTTGACCCGGCAGGAGGGGGTGATCCAATTTTGTAC

>lcl|HQ876582.1_cds_ADW94972.1_1 [gene=COI] [protein=cytochrome oxidase subunit I] [protein_id=ADW94972.1] [location=<1..>624] [gbkey=CDS]

TTATGAGCTGCATGTGTTGGAACTTCTCTTAGATTTATTATTCGAAGAGAATTAAGACAACCTGGAATTC

TTTTTGGTGATGAACAAATATATAACGTAACTGTCACAAGTCATGCTTTTATTATAATTTTTTTTTTCGT

AATACCCATTCTTATTGGAGGATTTGGAAACTGATTAGTCCCTCTTATAATTGGTGCCCCAGACATGGCT

TTTCCTCGTATAAACAATTTAAGATTTTGACTTCTACCCCCCTCCTTTACTCTTATTATAACTAGAACTA

TAAGTGAACAAGGGGCAGGAACAGGATGAACCGTTTATCCACCTCTATCTCACTTCTTTGCTCATAGAGG

ACCTAGTGTAGACTTAACTATTTTTTCTCTTCATATTGCTGGAGTATCTTCTATTTTAGGAGCAATTAAC

TTTATTTCTACAATTATTAACATACGAGCCCCTAGAGTACACTTAGAAAATATACCTCTATTTGTATGAT

CAGTTCTTATCACAGCTATCCTACTTTTACTAGCACTTCCAGTTTTGGCAGGAGGAATTACTATACTTTT

AATAGACCGCAACTTTAACACTTCTTTCTTTGACCCGGCAGGAGGGGGTGATCCAATTTTGTAC

>lcl|HQ876581.1_cds_ADW94971.1_1 [gene=COI] [protein=cytochrome oxidase subunit I] [protein_id=ADW94971.1] [location=<1..>624] [gbkey=CDS]

TTATGAGCTGCATGTGTTGGAACTTCTCTTAGATTTATTATTCGAAGAGAATTAAGACAACCTGGAATTC

TTTTTGGTGATGAACAAATATATAACGTAACTGTCACAAGTCATGCTTTTATTATAATTTTTTTTTTCGT

AATACCCATTCTTATTGGAGGATTTGGAAACTGATTAGTCCCTCTTATAATTGGTGCCCCAGACATGGCT

TTTCCTCGTATAAATAATTTAAGATTTTGACTTCTACCCCCCTCCTTTACTCTTATTATAACTAGAACTA

TAAGTGAACAAGGGGCAGGAACAGGATGAACCGTTTATCCACCTCTATCTCACTTCTTTGCTCATAGAGG

ACCTAGTGTAGACTTAACTATTTTTTCTCTTCATATTGCTGGAGTATCTTCTATTTTAGGAGCAATTAAC

TTTATTTCTACAATTATTAACATACGAGCCCCTAGAGTACACTTAGAAAATATACCTCTATTTGTATGAT

CAGTTCTTATCACAGCTATCCTACTTTTACTAGCACTTCCAGTTTTGGCAGGAGGAATTACTATACTTTT

AATAGACCGCAACTTTAACACTTCTTTCTTTGACCCGGCAGGAGGGGGTGATCCAATTTTGTAC

>lcl|HQ876580.1_cds_ADW94970.1_1 [gene=COI] [protein=cytochrome oxidase subunit I] [protein_id=ADW94970.1] [location=<1..>624] [gbkey=CDS]

TTATGAGCTGCATGTGTTGGAACTTCTCTTAGATTTATTATTCGAAGAGAATTAAGACAACCTGGAATTC

TTTTTGGTGATGAACAAATATATAACGTAACTGTCACAAGTCATGCTTTTATTATAATTTTTTTTTTCGT

AATACCCATTCTTATTGGAGGATTTGGAAACTGATTAGTCCCTCTTATAATTGGTGCCCCAGACATGGCT

TTTCCTCGTATAAACAATTTAAGATTTTGACTTCTACCCCCCTCCTTTACTCTTATTATAACTAGAACTA

TAAGTGAACAAGGGGCAGGAACAGGATGAACCGTTTATCCACCTCTATCTCACTTCTTTGCTCATAGAGG

ACCTAGTGTAGACTTAACTATTTTTTCTCTTCATATTGCTGGAGTATCTTCTATTTTAGGAGCAATTAAC

TTTATTTCTACAATTATTAACATACGAGCCCCTAGAGTACACTTAGAAAATATACCTCTATTTGTATGAT

CAGTTCTTATCACAGCTATCCTACTTTTACTAGCACTTCCAGTTTTGGCAGGAGGAATTACTATACTTTT

AATAGACCGCAACTTTAACACTTCTTTCTTTGACCCGGCAGGAGGGGGTGATCCAATTTTGTAC

>lcl|HQ876579.1_cds_ADW94969.1_1 [gene=COI] [protein=cytochrome oxidase subunit I] [protein_id=ADW94969.1] [location=<1..>624] [gbkey=CDS]

TTATGAGCTGCATGTGTTGGAACTTCTCTTAGATTTATTATTCGAAGAGAATTAAGACAACCTGGAATTC

TTTTTGGTGATGAACAAATATATAACGTAACTGTCACAAGTCATGCTTTTATTATAATTTTTTTTTTCGT

AATACCCATTCTTATTGGAGGATTTGGAAACTGATTAGTCCCTCTTATAATTGGTGCCCCAGACATGGCT

TTTCCTCGTATAAATAATTTAAGATTTTGACTTCTACCCCCCTCCTTTACTCTTATTATAACTAGAACTA

TAAGTGAACAAGGGGCAGGAACAGGATGAACCGTTTATCCACCTCTATCTCACTTCTTTGCTCATAGAGG

ACCTAGTGTAGACTTAACTATTTTTTCTCTTCATATTGCTGGAGTATCTTCTATTTTAGGAGCAATTAAC

TTTATTTCTACAATTATTAACATACGAGCCCCTAGAGTACACTTAGAAAATATACCTCTATTTGTATGAT

CAGTTCTTATCACAGCTATCCTACTTTTACTAGCACTTCCAGTTTTGGCAGGAGGAATTACTATACTTTT

AATAGACCGCAACTTTAACACTTCTTTCTTTGACCCGGCAGGAGGGGGTGATCCAATTTTGTAC

>lcl|HQ876578.1_cds_ADW94968.1_1 [gene=COI] [protein=cytochrome oxidase subunit I] [protein_id=ADW94968.1] [location=<1..>624] [gbkey=CDS]

TTATGAGCTGCATGTGTTGGAACTTCTCTTAGATTTATTATTCGAAGAGAATTAAGACAACCTGGAATTC

TTTTTGGTGATGAACAAATATATAACGTAACTGTCACAAGTCATGCTTTTATTATAATTTTTTTTTTCGT

AATACCCATTCTTATTGGAGGATTTGGAAACTGATTAGTCCCTCTTATAATTGGTGCCCCAGACATGGCT

TTTCCTCGTATAAATAATTTAAGATTTTGACTTCTACCCCCCTCCTTTACTCTTATTATAACTAGAACTA

TAAGTGAACAAGGGGCAGGAACAGGATGAACCGTTTATCCACCTCTATCTCACTTCTTTGCTCATAGAGG

ACCTAGTGTAGACTTAACTATTTTTTCTCTTCATATTGCTGGAGTATCTTCTATTTTAGGAGCAATTAAC

TTTATTTCTACAATTATTAACATACGAGCCCCTAGAGTACACTTAGAAAATATACCTCTATTTGTATGAT

CAGTTCTTATCACAGCTATCCTACTTTTACTAGCACTTCCAGTTTTGGCAGGAGGAATTACTATACTTTT

AATAGACCGCAACTTTAACACTTCTTTCTTTGACCCGGCAGGAGGGGGTGATCCAATTTTGTAC

>lcl|HQ876577.1_cds_ADW94967.1_1 [gene=COI] [protein=cytochrome oxidase subunit I] [protein_id=ADW94967.1] [location=<1..>624] [gbkey=CDS]

TTATGAGCTGCATGTGTTGGAACTTCTCTTAGATTTATTATTCGAAGAGAATTAAGACAACCTGGAATTC

TTTTTGGTGATGAACAAATATATAACGTAACTGTCACAAGTCATGCTTTTATTATAATTTTTTTTTTCGT

AATACCCATTCTTATTGGAGGATTTGGAAACTGATTAGTCCCTCTTATAATTGGTGCCCCAGACATGGCT

TTTCCTCGTATAAATAATTTAAGATTTTGACTTCTACCCCCCTCCTTTACTCTTATTATAACTAGAACTA

TAAGTGAACAAGGGGCAGGAACAGGATGAACCGTTTATCCACCTCTATCTCACTTCTTTGCTCATAGAGG

ACCTAGTGTAGACTTAACTATTTTTTCTCTTCATATTGCTGGAGTATCTTCTATTTTAGGAGCAATTAAC

TTTATTTCTACAATTATTAACATACGAGCCCCTAGAGTACACTTAGAAAATATACCTCTATTTGTATGAT

CAGTTCTTATCACAGCTATCCTACTTTTACTAGCACTTCCAGTTTTGGCAGGAGGAATTACTATACTTTT

AATAGACCGCAACTTTAACACTTCTTTCTTTGACCCGGCAGGAGGGGGTGATCCAATTTTGTAC

>lcl|HQ876576.1_cds_ADW94966.1_1 [gene=COI] [protein=cytochrome oxidase subunit I] [protein_id=ADW94966.1] [location=<1..>624] [gbkey=CDS]

TTATGAGCTGCATGTGTTGGAACTTCTCTTAGATTTATTATTCGAAGAGAATTAAGACAACCTGGAATTC

TTTTTGGTGATGAACAAATATATAACGTAACTGTCACAAGTCATGCTTTTATTATAATTTTTTTTTTCGT

AATACCCATTCTTATTGGAGGATTTGGAAACTGATTAGTCCCTCTTATAATTGGTGCCCCAGACATGGCT

TTTCCTCGTATAAACAATTTAAGATTTTGACTTCTACCCCCCTCCTTTACTCTTATTATAACTAGAACTA

TAAGTGAACAAGGGGCAGGAACAGGATGAACCGTTTATCCACCTCTATCTCACTTCTTTGCTCATAGAGG

ACCTAGTGTAGACTTAACTATTTTTTCTCTTCATATTGCTGGAGTATCTTCTATTTTAGGAGCAATTAAC

TTTATTTCTACAATTATTAACATACGAGCCCCTAGAGTACACTTAGAAAATATACCTCTATTTGTATGAT

CAGTTCTTATCACAGCTATCCTACTTTTACTAGCACTTCCAGTTTTGGCAGGAGGAATTACTATACTTTT

AATAGACCGCAACTTTAACACTTCTTTCTTTGACCCGGCAGGAGGGGGTGATCCAATTTTGTAC

>lcl|HQ876575.1_cds_ADW94965.1_1 [gene=COI] [protein=cytochrome oxidase subunit I] [protein_id=ADW94965.1] [location=<1..>624] [gbkey=CDS]

TTATGAGCTGCATGTGTTGGAACTTCTCTTAGATTTATTATTCGAAGAGAATTAAGACAACCTGGAATTC

TTTTTGGTGATGAACAAATATATAACGTAACTGTCACAAGTCATGCTTTTATTATAATTTTTTTTTTCGT

AATACCCATTCTTATTGGAGGATTTGGAAACTGATTAGTCCCTCTTATAATTGGTGCCCCAGACATGGCT

TTTCCTCGTATAAACAATTTAAGATTTTGACTTCTACCCCCCTCCTTTACTCTTATTATAACTAGAACTA

TAAGTGAACAAGGGGCAGGAACAGGATGAACCGTTTATCCACCTCTATCTCACTTCTTTGCTCATAGAGG

ACCTAGTGTAGACTTAACTATTTTTTCTCTTCATATTGCTGGAGTATCTTCTATTTTAGGAGCAATTAAC

TTTATTTCTACAATTATTAACATACGAGCCCCTAGAGTACACTTAGAAAATATACCTCTATTTGTATGAT

CAGTTCTTATCACAGCTATCCTACTTTTACTAGCACTTCCAGTTTTGGCAGGAGGAATTACTATACTTTT

AATAGACCGCAACTTTAACACTTCTTTCTTTGACCCGGCAGGAGGGGGTGATCCAATTTTGTAC

>lcl|HQ876574.1_cds_ADW94964.1_1 [gene=COI] [protein=cytochrome oxidase subunit I] [protein_id=ADW94964.1] [location=<1..>624] [gbkey=CDS]

TTATGAGCTGCATGTGTTGGAACTTCTCTTAGATTTATTATTCGAAGAGAATTAAGACAACCTGGAATTC

TTTTTGGTGATGAACAAATATATAACGTAACTGTCACAAGTCATGCTTTTATTATAATTTTTTTTTTCGT

AATACCCATTCTTATTGGAGGATTTGGAAACTGATTAGTCCCTCTTATAATTGGTGCCCCAGACATGGCT

TTTCCTCGTATAAATAATTTAAGATTTTGACTTCTACCCCCCTCCTTTACTCTTATTATAACTAGAACTA

TAAGTGAACAAGGGGCAGGAACAGGATGAACCGTTTATCCACCTCTATCTCACTTCTTTGCTCATAGAGG

ACCTAGTGTAGACTTAACTATTTTTTCTCTTCATATTGCTGGAGTATCTTCTATTTTAGGAGCAATTAAC

TTTATTTCTACAATTATTAACATACGAGCCCCTAGAGTACACTTAGAAAATATACCTCTATTTGTATGAT

CAGTTCTTATCACAGCTATCCTACTTTTACTAGCACTTCCAGTTTTGGCAGGAGGAATTACTATACTTTT

AATAGACCGCAACTTTAACACTTCTTTCTTTGACCCGGCAGGAGGGGGTGATCCAATTTTGTAC

>lcl|HQ876573.1_cds_ADW94963.1_1 [gene=COI] [protein=cytochrome oxidase subunit I] [protein_id=ADW94963.1] [location=<1..>624] [gbkey=CDS]

TTATGAGCTGCATGTGTTGGAACTTCTCTTAGATTTATTATTCGAAGAGAACTAAGACNNCCTGGAATTC

TTTTTGGTGATGAACAAATATATAACGTAACTGTCACAAGTCATGCTTTTATTATAATTTTTTTTTTCGT

AATACCCATTCTTATTGGAGGATTTGGAAACTGATTAGTCCCTCTTATAATTGGTGCCCCAGACATGGCT

TTTCCTCGTATAAATAATTTAAGATTTTGACTTCTACCCCCCTCCTTTACTCTTATTATAACTAGAACTA

TAAGTGAACAAGGGGCAGGAACAGGATGAACCGTTTATCCACCTCTATCTCACTTCTTTGCTCATAGAGG

ACCTAGTGTAGACTTAACTATTTTTTCTCTTCATATTGCTGGAGTATCTTCCATTTTAGGAGCAATTAAC

TTTATTTCTACAATTATTAACATACGAGCCCCTAGAGTACACTTAGAAAATATACCTCTATTTGTATGAT

CAGTCCTTATCACAGCTATCCTACTCTTACTAGCACTTCCAGTTTTAGCAGGAGGAATTACTATACTTTT

AATAGACCGCAACTTTAACACTTCTTTCTTTGACCCGGCAGGAGGGGGTGATCCAATTTTGTAC

>lcl|HQ876572.1_cds_ADW94962.1_1 [gene=COI] [protein=cytochrome oxidase subunit I] [protein_id=ADW94962.1] [location=<1..>624] [gbkey=CDS]

TTATGAGCTGCATGTGTTGGAACTTCTCTTAGATTTATTATTCGAAGAGAACTAAGACAACCTGGAATTC

TTTTTGGTGATGAACAAATATATAACGTAACTGTCACAAGTCATGCTTTTATTATAATTTTTTTTTTCGT

AATACCCATTCTTATTGGAGGATTTGGAAACTGATTAGTCCCTCTTATAATTGGTGCCCCAGACATGGCT

TTTCCTCGTATAAATAATTTAAGATTTTGACTTCTACCCCCCTCCTTTACTCTTATTATAACTAGAACTA

TAAGTGAACAAGGGGCAGGAACAGGATGAACCGTTTATCCACCTCTATCTCACTTCTTTGCTCATAGAGG

ACCTAGTGTAGACTTAACTATTTTTTCTCTTCATATTGCTGGAGTATCTTCCATTTTAGGAGCAATTAAC

TTTATTTCTACAATTATTAACATACGAGCCCCTAGAGTACACTTAGAAAATATACCTCTATTTGTATGAT

CAGTCCTTATCACAGCTATCCTACTCTTACTAGCACTTCCAGTTTTAGCAGGAGGAATTACTATACTTTT

AATAGACCGCAACTTTAACACTTCTTTCTTTGACCCGGCAGGAGGGGGTGATCCAATTTTGTAC

>lcl|HQ876571.1_cds_ADW94961.1_1 [gene=COI] [protein=cytochrome oxidase subunit I] [protein_id=ADW94961.1] [location=<1..>624] [gbkey=CDS]

TTATGAGCTGCTTGTGTAGGAACTTCACTCAGCTTTATTATCCGAAGAGAACTAAGACAACCTGGCATCT

TATTTGGAGATGAACAAATATATAATGTTACTGTTACTAGCCACGCTTTTATTATAATTTTCTTTTTTGT

AATACCTATTCTAATTGGGGGATTTGGAAACTGACTTGTACCCTTAATAATTGGTGCCCCTGATATGGCA

TTCCCCCGAATAAACAATCTTAGATTTTGATTATTACCACCATCTTTCACACTTATTATAACTAGAACAA

TAAGAGAACAAGGAGCAGGAACAGGATGAACAGTATACCCCCCCTTATCTCATTTTTTTGCCCATAGAGG

TCCCAGAGTAGACTTAACTATTTTTTCTCTGCATATTGCAGGTATTTCTTCAATCTTAGGAGCCATTAAT

TTTATTTCTACAATTTTAAATATACGAACTCCTAGAATAACTTTAGAAAATATACCTCTTTTTGTATGGT

CCGTTCTTATTACTGCTATTCTTTTGTTATTAGCCCTACCTGTATTAGCCGGAGGTATTACAATACTATT

AATAGACCGAAATTTTAACACTTCTTTCTTTGATCCAGCAGGTGGAGGAGATCCTATTTTATAC

>lcl|HQ876570.1_cds_ADW94960.1_1 [gene=COI] [protein=cytochrome oxidase subunit I] [protein_id=ADW94960.1] [location=<1..>624] [gbkey=CDS]

TTATGAGCTGCATGTGTTGGAACTTCTCTTAGATTTATTATTCGAAGAGAACTAAGACAACCTGGAATTC

TTTTTGGTGATGAACAAATATATAACGTAACTGTCACAAGTCATGCTTTTATTATAATTTTTTTTTTCGT

AATACCCATTCTTATTGGAGGATTTGGAAACTGATTAGTCCCTCTTATAATTGGTGCCCCAGACATGGCT

TTTCCTCGTATAAATAATTTAAGATTTTGACTTCTACCCCCCTCCTTTACTCTTATTATAACTAGAACTA

TAAGTGAACAAGGGGCAGGAACAGGATGAACCGTTTATCCACCTCTATCTCACTTCTTTGCTCATAGAGG

ACCTAGTGTAGACTTAACTATTTTTTCTCTTCATATTGCTGGAGTATCTTCCATTTTAGGAGCAATTAAC

TTTATTTCTACAATTATTAACATACGAGCCCCTAGAGTACACTTAGAAAATATACCTCTATTTGTATGAT

CAGTCCTTATCACAGCTATCCTACTCTTACTAGCACTTCCAGTTTTAGCAGGAGGAATTACTATACTTTT

AATAGACCGCAACTTTAACACTTCTTTCTTTGACCCGGCAGGAGGGGGTGATCCAATTTTGTAC

>lcl|HQ876569.1_cds_ADW94959.1_1 [gene=COI] [protein=cytochrome oxidase subunit I] [protein_id=ADW94959.1] [location=<1..>624] [gbkey=CDS]

TTATGAGCTGCATGTGTTGGAACTTCTCTTAGATTTATTATTCGAAGAGAACTAAGACAACCTGGAATTC

TTTTTGGTGATGAACAAATATATAACGTAACTGTCACAAGTCATGCTTTTATTATAATTTTTTTTTTCGT

AATACCCATTCTTATTGGAGGATTTGGAAACTGATTAGTCCCTCTTATAATTGGTGCCCCAGACATGGCT

TTTCCTCGTATAAATAATTTAAGATTTTGACTTCTACCCCCCTCCTTTACTCTTATTATAACTAGAACTA

TAAGTGAACAAGGGGCAGGAACAGGATGAACCGTTTATCCACCTCTATCTCACTTCTTTGCTCATAGAGG

ACCTAGTGTAGACTTAACTATTTTTTCTCTTCATATTGCTGGAGTATCTTCCATTTTAGGAGCAATTAAC

TTTATTTCTACAATTATTAACATACGAGCCCCTAGAGTACACTTAGAAAATATACCTCTATTTGTATGAT

CAGTCCTTATCACAGCTATCCTACTCTTACTAGCACTTCCAGTTTTAGCAGGAGGAATTACTATACTTTT

AATAGACCGCAACTTTAACACTTCTTTCTTTGACCCGGCAGGAGGGGGTGATCCAATTTTGTAC

>lcl|HQ876568.1_cds_ADW94958.1_1 [gene=COI] [protein=cytochrome oxidase subunit I] [protein_id=ADW94958.1] [location=<1..>624] [gbkey=CDS]

CTGTGAGCCGCATGTATCGGAACTTCTCTAAGATTTATTATTCGAAGAGAGTTAAGACAACCCGGCATTT

TATTTGGGGATGAGCAAATATATAATGTAACCGTAACAAGCCATGCATTTGTTATAATTTTTTTTTTTGT

TATGCCTATTTTAATCGGAGGATTCGGAAACTGACTCGTGCCCCTTATAATTGGAGCTCCTGACATAGCA

TTTCCACGAATAAATAACCTTAGATTCTGATTACTACCTCCCTCTTTTACTTTAATTATGACAAGAACTA

TAAGAGAACAAGGAGCAGGAACTGGATGAACGGTATACCCCCCCCTATCTCACTTTTTTGCGCATAGGGG

ACCAAGTGTAGATCTGACTATTTTTTCTCTTCACATTGCCGGAGTATCTTCTATTCTCGGAGCAATTAAC

TTCATCTCAACAATTATTAACATACGTGCACCAAAAGTCCACTTAGAAAACATACCTCTTTTCGTATGGT

CCGTGCTTATTACAGCAATTTTATTGTTATTGGCCCTTCCAGTACTAGCTGGAGGAATCACAATGTTGCT

AATAGATCGCAATTTCAACACTTCTTTTTTTGACCCTGCAGGAGGTGGAGATCCTATTTTATAT

>lcl|HQ876567.1_cds_ADW94957.1_1 [gene=COI] [protein=cytochrome oxidase subunit I] [protein_id=ADW94957.1] [location=<1..>624] [gbkey=CDS]

TTATGAGCTGCATGTGTTGGAACTTCTCTTAGATTTATTATTCGAAGAGAACTAAGACAACCTGGAATTC

TTTTTGGTGATGAACAAATATATAACGTAACTGTCACAAGTCATGCTTTTATTATAATTTTTTTTTTCGT

AATACCCATTCTTATTGGAGGATTTGGAAACTGATTAGTCCCTCTTATAATTGGTGCCCCAGACATGGCT

TTTCCTCGTATAAATAATTTAAGATTTTGACTTCTACCCCCCTCCTTTACTCTTATTATAACTAGAACTA

TAAGTGAACAAGGGGCAGGAACAGGATGAACCGTTTATCCACCTCTATCTCACTTCTTTGCTCATAGAGG

ACCTAGTGTAGACTTAACTATTTTTTCTCTTCATATTGCTGGAGTATCTTCCATTTTAGGAGCAATTAAC

TTTATTTCTACAATTATTAACATACGAGCCCCTAGAGTACACTTAGAAAATATACCTCTATTTGTATGAT

CAGTCCTTATCACAGCTATCCTACTCTTACTAGCACTTCCAGTTTTAGCAGGAGGAATTACTATACTTTT

AATAGACCGCAACTTTAACACTTCTTTCTTTGACCCGGCAGGAGGGGGTGATCCAATTTTGTAC

>lcl|HQ876566.1_cds_ADW94956.1_1 [gene=COI] [protein=cytochrome oxidase subunit I] [protein_id=ADW94956.1] [location=<1..>624] [gbkey=CDS]

TTATGAGCTGCATGTGTTGGAACTTCTCTTAGATTTATTATTCGAAGAGAACTAAGACAACCTGGAATTC

TTTTTGGTGATGAACAAATATATAACGTAACTGTCACAAGTCATGCTTTTATTATAATTTTTTTTTTCGT

AATACCCATTCTTATTGGAGGATTTGGAAACTGATTAGTCCCTCTTATAATTGGTGCCCCAGACATGGCT

TTTCCTCGTATAAATAATTTAAGATTTTGACTTCTACCCCCCTCCTTTACTCTTATTATAACTAGAACTA

TAAGTGAACAAGGGGCAGGAACAGGATGAACCGTTTATCCACCTCTATCTCACTTCTTTGCTCATAGAGG

ACCTAGTGTAGACTTAACTATTTTTTCTCTTCATATTGCTGGAGTATCTTCCATTTTAGGAGCAATTAAC

TTTATTTCTACAATTATTAACATACGAGCCCCTAGAGTACACTTAGAAAATATACCTCTATTTGTATGAT

CAGTCCTTATCACAGCTATCCTACTCTTACTAGCACTTCCAGTTTTAGCAGGAGGAATTACTATACTTTT

AATAGACCGCAACTTTAACACTTCTTTCTTTGACCCGGCAGGAGGGGGTGATCCAATTTTGTAC

>NC_031407.1 Ramazzottius varieornatus strain YOKOZUNA-1 mitochondrion, complete genome

CTGCGATGAATATTTTCAACAAACCATAAAGATATCGGAACCCTATATTTTATTTTCGGCATTTGAGCCG

CCACAGTGGGAAGATCACTTAGTATAATTATTCGTTCCGAACTTAGAGAACCCGGCTCACTGTTTGCCGA

AGAGCAACTTTACAATGTCACAGTAACCAGACATGCCTTTATTATAATTTTTTTTTTTGTTATACCTATT

CTGATCGGAGGCTTTGGAAACTGATTAGTCCCACTTATAATTGGGGCGCCGGATATAGCTTTCCCACGAA

TAAATAATTTAAGATTTTGACTTCTGCCCCCCTCTTTTCTATTAATCTCAACAAGCACAATAGCTGAACA

GGGGGCAGGAACGGGATGAACTGTATACCCGCCTTTATCCAATTATTTTGCTCATAGTGGCCCTGCCGTA

GATTTAACCATTTTCTCTCTCCATATTGCTGGCGTCTCTTCAATTTTGGGAGCAATCAATTTTATTTCCA

CAATCATTAACATGCGAACACCTGCCATAAGAATAGAAAACATACCATTATTTGTGTGATCGGTTTTAAT

TACAGCCGTTTTACTGCTTTTGGCCCTTCCTGTACTAGCTGGTGCTATTACCATACTTTTACTTGACCGA

AATTTTAATACTTCTTTTTTCGATCCAGCAGGGGGAGGGGACCCTATTCTATACCAACACCTATTTTGAT

TTTTTGGCCACCCAGAAGTTTATATTTTAATTCTTCCGGGGTTCGGGCTAGTGTCTCAAATTATTGTACA

TTACAGAGGAAAACATCTGACTTTCGGGCACCTAGGAATAATTTATGCCATGAGAACAATTGGTCTATTA

GGATTTATTGTATGAGCTCATCACATATTTACTGTAGGTATAGATCTAGACACTCGAGCTTACTTCACAG

CCGCAACTATAATTATTGCAATTCCTACAGGTATTAAAGTTTTCAGATGATTAAGAACAATTTACGGAAG

AAAATCTCTAATACACGCCCCTATACAATGAGTATTGGGTTTTATTTTTCTTTTCACCCTTGGAGGATTA

ACAGGAATTGTCTTGTCCAACTCCTCGTTAGATATTGTTTTACATGATACTTACTATGTCGTAGCTCACT

TCCACTATGTTCTCTCAATAGGAGCTGTTTTTGCAATTATCGCGGGAATTACTCATTGATTCCCGCTTTT

TACAGGCACCCAAATAAATAACAAATGATTAACAGCGCAGTTTTTTAGAATATTTATCGGAGTTAATATA

ACATTTTTTCCTCAACATTTTCTAGGACTAGCCGGGATACCTCGACGATATGTAGATTACCCAGATACGT

TTTATTTGTGGAATAATGTTTCTTCATTAGGGTCTATCTTGTCTATCGCAGCTACAATTTTTTTGTTTTT

TATTATTTGAGAAAGCTTAATTTCACAACGAAAAATTTTATTTATCGCAAGCTCTAATAGAGTAATAGAA

TGAAAACACAACTTTCCGCCAGTGTTGCACTCATATAGCCAACTAAGATTAATTAATTACTAAAATGGCT

AGCTGAGAGCAATTAAATTTTCAAAACAGATTTTCACCTCTTATAGAGCAATTTATTTTTTTGCATGACC

ATATCATATCTATTCTCACACTAATTATACTTATTGTTGGATACAGGCTGAGTAAATTATGCCTTAGCAA

ATTTAATGTAACTAAACAAAGAGAAAATCACGAATTAGAAATTTTATGAACTTTTTTGCCAGGAGTATTT

TTAATTATTATCGCTTTCCCGTCTTTGCGTTTACTTTACTTATCAGAGGAAAGAGAAAAATCTCCCTTAA

ATATTAAGACAATAGGACACCAATGATATTGATCATATGAATACAGAGATTTTAAAGATCTTGAATTTGA

TGCTTTTATAAGACCTGTAGAAAAAACCACTTCTTTTCGTTTGCTAGAAACAGATAATCATACCTGCATC

CCAACTAACACTCCCATTCAAATATTTGTATCTTCAACAGATGTTTTACACTCATGAACCATTCCAGCTA

TAGGAGTAAAAGCTGATTCCACTCCAGGACGACTGAACATTATCAATATTATTGCAATAAAACCAGGTTT

ATTCTATGGACAGTGTTCAGAAATTTGCGGAACGAACCACAGTTTTATACCCATCACCCTTGACACACGA

CCAATTTTCTTTTTCAAAGAATGAGTAAAAACAATAATTAACAGATAATTTTAAAGCTTTAATGCATCGA

GCTTTTAATTCGAAGACACAGAATAGTCTGTTTAAATTAGAAAATTTAATTAAAAAAAAATAATATAAAG

TTGTCAACTTTAAATTACCAGACTGTAATTTTCTATACCCCACATGTCAAACTTACCGTGAATAAGAATT

TATATCACCATATTTGTTATGATAAATCTAATTTTTATAAGTTATTCATCCCCTCTACATAATAGTACCA

ATAAAAAACTCTCAACAAAATTATTGTCTGAAAAAAACAAATGATTATGATAACAAGACTGTTTTCATCG

TTTGACCCCATAAGAGGTTTTTTTTCCATAAATTACCTTTCTTTTTTAACTTTGCTAATAAGACCGATTT

GTATAGATTTCATATTTTTACAAAAAAGTCGAAACAAATTTATCAACTTAGATATATACGCATCAATTGA

AAGAGAGTTAAAAAGGACAATTTCAAACTCTTTTAAAAAAGGAAAAACCAATATTCTTATGGGTGTATTC

TTTAGTTTATTGCTTATAAATTTAGCAGGCTTAGTACCTTATGTATTCACAAGAACAGCTCACATAACTG

TAACCCTATCAATGACACTACCATTTTGACTGGGTTTTATTTCATTCAGTCTTATTAATAACACAAACCA

TTTTTTTAGCCATTTAGTGCCACTAAGCACCCCCCTTCCGCTCTCACAATTTATGGTAATCATCGAAAGA

GTAAGTCAACTTATTCGGCCAATTACTTTATCAGTGCGATTAGCTGCTAATATAACAGCTGGACACATTT

TAATAGGACTTGCAAGTAGCAACGTGACTATGTTAAACTTATCTAGCAGAATTCTTATCATGCTTATTAT

TTTAGAAACGGCAGTAGCTTTTATTCAAAGATATGTATTCACTATTCTAATCTCGATATACATAAATGAA

GCCTAATGATCAATCAAAATCATCCCTTTCATTTAGTTTTTAACAGACCATGACCTATTTTTACGGGAAG

AAGTGTATTAACCATGCTTATCGGAACTGTAAATTGGATATGTACTAAATCCCCCACAATAATAAACATG

GGACTCTTACTGACAATTTTTAACACCTCCCAATGATGACGCGATGTTTCACGGGAAAGATCTTACCAAG

GCTATCATAGGAACTTAGTCATAAATGGGCTTCGATGAGGAATAATCTTATTTATTACTTCCGAAATTTT

GTTTTTCTTTTCGTTTTTTTGAAGGTTCTTTCATAGAAGACTAGCGCCCAACTTGGAATTGGGATTAATA

TGGCCACCCTTAGGAATTGCAGCCATTAACCCATTCCAAGTTCCTCTTTTAAATACTTCAGTTCTTCTAG

CAAGAGGAGTTTTTGTAACTTGAGCTCATCACGGCTTAATTGAACAGAATAATAAGATTATAAATACAAA

TATAATAGTAACAGTAGTAATAGGCTTATACTTCACTTCCCTTCAAGCTTGAGAATACTGAGAATCATCT

TACTCAATAAGAGATTCAAGATTTGGAAGAACTTTCTTTCTAGCGACTGGATTTCATGGACTTCACGTTT

TAGTGGGAACAATTTTTTTATTAGTGTCTCTAATGCGACACAACCTAAATATGTACTCTTTAAACCATCA

TTTAGGCTTAGAAGCTTCTATCTGATACTGACATTTTGTAGACGTAGTCTGATTGTTTTTGTATAGTTTT

CTTTATTGATGAAGTTATTACACTTTTAATATATTTAGTATATTTGATTTCCAATCAAAAAGTTTGACTC

AAACAGTGTAATCATAATTCCTACATTTAGACTTATTGCAATCATTATTATCTTAATAGCCCTCTCCTAT

GTAATAAAAACTCAAAATCGGGTTAAATGACAGGAAAAAATAAGAAATTTTGAGTGCGGATTTGATTCTA

ACCACACTAACCGAATAGCGTTTTCTTTACGATTTTTTATTATTACAGTAATTTTTTTAGTTTTCGATAT

CGAAATTGCTGTAATTCTTCCGAGCCCCATAGTAGAAGAAAGTCTTTCCATTAAAAGAAGAACAATAATT

AATTGAAGATTTTTTACCTTACTATTGGGGGGCCTAATTTTTGAATGGCAGCAAGGTGCTCTAGAATGAT

CATGGGAGTGTATTTAAAATAATAAAATTTAAATTGCAATTAAAAATTGTCAACGACCTCACCCAAAATA

AGATATGGTAGTTTCGACCTACTTTTAGATTCATTTAATCCTTATTTATCATAATAAATTGTGACTGAAA

CAGTGTTTAGATGTTAACTAAAATCATAAGAAAACTTCAATTTAAAGAATTTAAAATTTAAAGCCGCTAA

CTTTAATAATTGTGCATAGCATGAAGATTCTTAAATAAATAATGTAAACTAACATATTATAATTTCATTA

TAAAAATGCCAAAGGTTTTATTTTGTAAAAGAAAATTACTTTTATTAGATTCTTCAAATCTAAGCTTTAA

TATAAGCTACTTAAACAGATGAAAAAAAATAATAAAAAAATAAAAAGTGCAAAAAAATATACCAATCTTC

ACTCAACAAAAGACATCACAAGAACAGAAGCTGAAGTAAAAGAAAAAAAAATATTTTGAGGGCCATAAAA

CTCTCACCAACTCTGGTCTAAAAAACAAAAAATTTTATCAGCTATAATAGTAAATAATTTAACACCTCGA

GCCGTCATGTTTTGATTTAAAACCCATATAAAACTAAAAAAATATAATTTTAAAAAAAAAATTTTTTTTA

AGATAAATATATAAGCCAAAGACAAAAATGCTACTAATATCAAATAAAAAAGTTTTCAAATAGATAATAA

ATAAGTAAAAAAAAAAAAAAAATTAAAAAAGAACTCTCTTCAAAAAGAACCTATAACAATAGAAAAAATA

ATTAAACTCCAAATTGGCAAAATCAAATACTTCACATTCTCGTACACTCCAGATAAAGATGAACGAAAAG

AAGAAAGGGAAATAAGCATATAATAAGAAAATCGTAACGAATACAAAATAGTCATAAACACCCCAATTAA

AAATAAAATAATAAGCACAAACCTTCTTAATAAAGTATCTAAAATTAAATCTTTAGAAAAAAACCCAGAT

AAAAAGGGAAACCCGCACAAAGACAAAATGCAAACTACAAAAGAAGAAGCAAATAATTTTTTGCCGGAAG

AAAAAGGAGATATATTACGAAAATCCTGTCTTCTGTCTTCTCTATGAATAACCAGCCCCCCTCTTATAAA

AAGAGAAGCTTTAAACAAAGCATGAGTTAATAAATGAAAAAAACAAAAGATGATTAAACCAGTTGAATAA

GAAAGTATTATGAAAGAAAGTTGTCTTAAAGTAGAGTATGCAATAATTTTTTTCATATCTCATTCTAAAT

TAGCTATTGTCCCAGCTATTAATATGGTAAAAACTGAAATAACAATGAGAAAATAAAAAAACTTCAATAT

CAAAGGACTAAACCGAATCAGAAGAAATACCCCAGCCGTTACAAGTGTAGAAGAATGAACTAATGACGAA

ACTGGAGTGGGGGCTGCTATCGCAGCTGGAAGCCAAGACGAAAAAGGAATCTGGGCTCTCTTTGTAATAA

AAGTAATTAATAAAAAAAAAGCTCCCATTTGTACGAATACTAAAGCTTTATTATCAAAATATGAAAATAA

TGAAAACAAAGAAAACAAACTAAGAGAAAAAAGAAAAAAAATATCTCCGACTCGGTTTATCAAAAAAGTC

AATATTCCTGCTACTGAACTGGAAACACTCATATAATAAACCACTAATAAATAAGAAACTAAGCCCAAAC

CGTCTCATCCAAGAAGTAAAAAAAATAAATTAGGACTAAAAATTAAAAAAAACATAGAAATAACAAAACC

ACTCAACAGCAAAGAAAACCCCTTTTGCTGAGTATCTCCGTCCATATAAAATTGAGAAAAAAAAAAAATT

ATAGCAGAAATAAAACTAACAACTGAAGCAAACAAAATAGAATAAAAATCAATTACAAAAGAAACAGATA

AAGAAGTGAAAAAAGAAGTAAACAATTGAAATTCGATAACTGTGACCCCTATACTAAATAAAAAAAAAGT

CATAATAAGGAAAAAAACAAAAAAAAACCCCCTTAGCCATAAAGTCAATATTAGTTGGAAAGCCATTTTT

GTAACCACAATACAATATTTTACACTTAAATTAAACTAATACTTTAAAAAAAATCTAATAGCAAGACTAT

TAATAATGCAGGCAAAAAATGATATGAAAGAACAAAAAAATTTAAATCTATTTCGACCTGCAAAATATAG

TGCTTCAACCCCAATCCGTGAATCACCACTCTAAACAAATAAATACAAAAAGCTGCCACAACAAAACTTG

CTAACCCTAAAACATATATATAAGTCAAATCTTTGCCAAAAGATCTGATAAAAACACCCAACTCTCCAAC

TAATGACAGAAAAGGGGGAGCTGAAAAATTAATTGCTAAAAACAAAAATCAAAAAGACATAAGTATCCCA

AAAAAAATGAACTGACCCCGGTTATTGAAAATTTGACGAGAATAAGATCGCTCATAATGAAAATTTACTA

AATAAAAAAGAGCCCTAGAACAAAAAGCATGAGACATTATAATAATAATTGCAGCTTTTAACCCTATTTG

TCTAAAAAAGAAAAACCCCCCAAGCATCACTCCTATATGACCAACGGAAGAATAAGCAATTAAAGATTTC

ATATCCGTTTGTCGCAAACATACTAAACTACTTAATAAAGCACCTCAAAATAAAAAAACCAAAGCAAAAA

AAAAAAAAAAAAATAAAGGCTTTATTAAAGGTGAAACACGATAAAATCCATACAATCTTAACTTTAATAA

AACAGCAGCTAAAATTATAGACCCCGAAACAGGAGCTTCGACATGAGCCTTAGGGAGTCATAAATGAAAG

CCGTAAAGAGGCAACTTAATAAAAAAAGCAATTATTATAGCTAAAAATAATAATAAAACAAAATTTTCCC

TATAGTTTTTTAAATAGTATAATATGAGCCAATCTAACGATAAGTAACTGTAAGTTAACAAAAAAAAAAA

TAGCAAAGGTAAAGAACCAAACATAGTATAAAGAAATAAATAAAAAAAAGCTTGAACACGTTCAACCTGA

TAGCCCCACCCCAAAATAATAAAAACTAGAGGCACAAGAGAAATTTCAAAAAAAATGTAAAAAGCCATTA

AATCTGAAAACATGACTGAAAAAACAATAAAACTTATGAGAATATATATATACATTTTGTATTTTATGAG

AGACACTTTTAAAATTTTATACTTTTGGCCCAACAAAAATATCAAAGAAAAAAGCCAAAAAGATAGAATG

ATAAGCAAAAAAGAAATTTTATCAAAAAATAAAATTTCAGAGATAAAAAAAATAGGACCCCCAGTAAAAA

TGGTAAACAAAAATAAAACAAAAAGCACAGCCAAATCAACCGCACCTAAGAAAGAAAATATTATTAAAGG

CAAGCTTAATATAATTAATAAAATTAAAATACTAAAATACCGAATCTATAAACATAATCTTTTATAGAAG

AACGAATAAAATAAACAAAAAGAGTTAAACCCAATACAGATTCCCTAGCTGTAATAACTAAAAAAAATAA

CGTGAACAAAAAAAAATAATTTAAAAAAAAAATTAAAAGCATAAATAAAAACAGCCCCAAAAACTCTAAA

GAAATAAAAATAGAAAGAAGATGATCAAATTTTAATACGAAAAGAAACGCCATATAAATCAATATAAATG

AAAAAAGAAAAGAAATAGCTAAAATAGTTTAAATAAAAACGCAGACCTTGTATGTCTACAATACTTAAAA

GTTTTTAACTTCAGAAAGAAAATCACATCTTAAATCTCCAAAATTTAAATTTTATAGTTAAACTATTTCC

GAAATAAAAGAAATCATAATCATAAGAAGAATCACTTTATGATTTTTCAGCCTTTTCCAGCACCCTTTAA

TTCTAGTAGGCATTTTAACTGTCCAAAGCGCCCCGGCAATTTATTCCGCTCTACACGCTTCACACAGGGG

ATGAATAGCTTTTTTATTATTTTTAATTTTTTTAGGGGGATTGTTAATTATTTTCGTTTATCTTTCAGCC

CTGATTCCTAACGAAATTTTTTTACCCTCCCGCATAGAAAATGCTAGATTTTCTCTCTTAGCATTGCTGC

CAATTTTGTGATCAATAAAAACTATTAAATTTAGCTTTTTTAACCATAGACAGAGGCCAGTAAGAGATTT

TGCCCACTTATTTTATCATAATATATTTACATTTATACTGTGTTATTTATTTATTTCTCTTACCGCGACA

ATATATATCACATCCAAATATAAAACACCAATGAAAAGATCTTATTATGACAAATATACGAAAAACCCAC

CCCCTAATTAAAATCATAAATTCTGCTCTAGTGGATCTACCAGCCCCTTCTAATATCACTCACTTTTGAA

ATTTTGGATCTCTTTTAGGGGTATGCTTAATAACTCAAATTATTACAGGCATTTTTTTAGCAATACACTA

CAGATCAAGAATTGACTTAGCTTTTGACTGTATTAGACATTTAATACGAGACGTGCAAGGGGGTTGACTA

ATGCGAGTAATTCACGCCAACGGAGCATCACTATTTTTTTTAGCCTTTTTTATTCATATTGGTCGAGGAT

TATATTTTAAATCATATGTGCTGAATATAACTTGGATCAGAGGAGTAACTATTTTTTTAATATCAATAAT

AACAGCATTTTTAGGCTATGTCTTACCTTGAGGACAAATATCTTTTTGAGGAGCAACTGTAATCACAAAC

TTATTATCGGCAGTCCCCTATATTGGAACACCTTTAGTGGAATGAGTGTGAGGAGGCTTTTCTGTAAATA

ATGCAACTCTTACTCGATTTTTTTCATTGCACTATTTATTACCTTTTGTCATTAGACTATTAGTAATTGT

TCATTTAACTTTTCTCCACGAACAAAAATCCAGCAACCCATTAGGCCTACGATTGGGGAGGGACAAAATC

ACTTTTCATCCTTATTTTTCTTTAAAAGACCTAACGTCACTACTTTTAATTATATTCATATTCATAATAA

TTAACTATACTTTCCCATTTTCTTTAATAGACGCAGAAAATTTTATTCCCGCAAACCCTATAGTCACACC

CGTGCACATCCAACCGGAATGATATTTTCTATTCGCCTATGCTATTCTACGCGCAATTCCTAATAAATTA

GGAGGTGTCATAGCACTTCTACTGTCAATCTTAATATTAATTCCTTTAATTTTACAATCATCAATAAAAC

AATTCAACAAAGAAAATCAAAAAAACATGTTTTTTTGATTTTTTGTTATAATTTTTCTAATCCTAACATG

ATTAGGAATAAAACCTGTAGAAGAACCTTTTTTAAGAATGAGAATTGTAAGCACATTTTTTTATTTCAGA

TGATTTTTCATTTAAAAACCGCTATCTAATGTTTTGAAAACATAAAAAAAGTATTAAATATACTTATCGG

TTTTAAACTAAAAGGAAAGAAAAAAAAAAAAAAATAAGAACTAAGGGTAAAAACTTTTTTCAAGTTAAAT

ATATTAAATAATCATAACGCAAACGAGGAAATGAAGAACGAAAAATTAAAAATAAAAAAACAAAAAAAGA

AAAAAAACAAAAATTGAATAAAAAAGAAAAGTTCAAAAAAAGAAAAAAAGTACATAAAAGTCTCATTCAT

AAAATGCTAGCATATTCAGCTATAAAAATTAAAGCAAACTTCAAACCTCCGTACTCTACATTAAAACCGG

AGACTAGCTCAGATTCTCCCTCAGCCAAATCAAAAGGAGCTCGATTTGTTTCAACAACACATGAAATAAA

AAAAACTACTGCCAAAGGAAAAAGAAAAAAAAAAAATCTAAAATAAGTATGAAAATTATAAATTTCAAAA

AAACTGTATGAAACAAAAAAAAAAACTAAAGACAAAAAAATAAAAGCAAGAGTGATTTCGTAAGAAACAG

TTTGAGCAACAGTACGCAGACCCCCTATCAAAGCATATTTAGAATTAGAAGACCATCCTGAAAAGATCAC

GCCATAAACTCTTAAACTAATACAACACAAAAAAAATAAAAGAGAAAATTTAAAATCAAGATAACCAGAA

AACCTAAACAAAGAAACCCATAACAGTATAGTAATAACAAAACCCAAAATTGGAGAAAACCAATAAAGCA

AAAAATTTGAAGACACAGGAACTATTTCTTCTTTGGAAAACAATTTCAATGCATCCGCAAAAGGTTGAAG

AAGACCGACAAAACCAAGTTTATTGGGACCTTTACGAAGTTGCCTGTATCTTAGCACCTTACGTTCAACT

AGTGTTAAAAAGGCAACAGCAACTATAACAAAAATTAAAACCTGAAAATAGTAAACAGAAACATCAAATA

TAAAGAGTATTTTTAGAAAAATAAAATTTATATTTGAATTTTAAATTCAAAGCACTAATCTGCCACACTA

AACTACTTTAAGAAAATGTAAATTTATATACTACCCTATCAAGATAGTCCTTTTTCAGGCATCTTAAAGT

GTATAAAATACATTTTTAAATCCTAAATTTAACACACTAATCTGCCAACAAAAATTTTTAAAAAACTATA

TAAATATAATAATATAAAACATTTTTAATTACATTTTAAATCGCTACGCCCAACCAAGTTTCAATATTAA

ATTAATTAATGAACAAATAAATAAGAAATTATATAAGAATAATAAATAAATAAGAAAAGAAACAAAAATA

AGAATAAGAGAAAAAGCAAATAGAAAAGATGACCTCATACAAAATAAAGCAGGCAAGGGCGACCCCAAAA

GGTCGGTTGTTCTGAAACTCCTTTTTCCAATTATATATTGAAGAAAACTAATAATAAATATAATATATTT

ATTTTACTGACACTTTTTAAAATCTGGCCCAAAGGGCGCCTCAATAAATAGAGACTTTTTTTTTTTTTTC

TTAATTTTAATATTTAATAACAATTAAACTAAATAGGAGTCCTTTCGTACTATCTATTTTATTTTATTTT

GTCAAAAAAGATAAAGACCAACCTGGCTTACACCGATTTGAACTCAGATCATGAAAAGTTTTATTTGTCG

AACAGACAAACTTAAAAAAGATCTGCCCCTTCAAGTGACTTTAATCCAACATCGAGGTCGTAAACTTTTA

AAACGATTTGAACTCTTCTTAAAAATAACGCTGTTAACCCCAAGGTAATTTATTTTTCATCACTCATAAG

TGGATCTTCTTTTTTGCCAATAAAAATTTTTTTTATAAATGAGATTTCATTAACCGCCCCAGTTAAAATA

AGTTTATATGAGAAAAACAAAAGAATTATTAAAACTCTACGGGGTCTTTTCGTCTTTTTATTAATAAAGA

GTATTTTCACTCTACATCTAACTTCAACTCAATAAAAAAAATAAAAAATTTTTTCAAAACGCCTTTCATT

CCAGTCCCCAATAAAAAGACAAATGATTATGCTACCTTAGCATAGAAATCTACGGCCGTTAATATCTCAC

CGGGCAGACATCATACTAAATTATATCTCAGTACTATGTTTTTGCAAAACAGATGAAAAAATACAGTCAA

ATTAATTTTAAATATTTTAAATGCTATTACACACCGAGTAAACAATAATTCTACTAATTTTCTCATAGTT

TTATAGCTATCGCCTATTAAATTAAATTTTTATTTCAACTACGATAATAAAATAATTAGTAAATTAATAA

GTTATAAAACTTTACACTTCTAATTTTAATAAAATATCAAAAATTTTGCTATTGGGAAAAGTAAGATAAA

AATTTAAACTTTTAAGCTTGCATCTGAAAGAAAAAAAAATAAATTTAAATCTAATTAACTAGATACCTAT

TGAATCAAGACTTTTTATCACTTTTTAATTTTAAATTCAAATTTTCCACTCTGAAACGGTAAGAATCCTA

ATAATTAAAAAAACTTCAATAATCGAGAAACAATAAACCCAATCAAATAAAAAAATCCTTAACCCCAAGG

CACGACCCTTCAATTCATTGTTTATAATAATTTTCTTTTTTAACAAAAATATGTTGCTTCTCTTTACATA

AAATTTAAATTTTAATATTATTGTTTTTTCTTTAAAGCAACCCTTGTTAAGGATAATAATTCATTGTAAA

AGAATAAAATACTTTAAAGGCTAATCTTCCGATTAGCCCACTTTGTTACGACTTTTTTTTCCTAAGGGAA

AAAGTGACGGGCGATATGTGCACACCCGGAAAAAATATTCAAAATAAAAATATATGTATTTTTACTTTCA

AATCCAATTATTTTTAAATATCCTACTTAAATTAACAAAAAAGAAATTGTAACCAATCTGACCTTTGCTA

TAAACTATATGTAGATCTGAAAATTAAAGTTAATTCTTTATTTAGTGAAGCCAAAAGCAATATATCGACG

ACGATATATAAATTCAAATAAGCAAAGTAAATTCTTGCGCGTACTTTCTTTTAGCAGACAGCTCCCTCTG

ATAAACCAAATGCCGCCAAATTTTTTAAATTTTAAATATTTAAACCTCACTCCTTTGGCTATTACAAAAA

AATAACAAGGTATCTAATCTTGGTTTTTATGATTTTTATAAAAAAAACTATTTAAAAATCTCCTATAAGA

AGAATAATTTTACTTACAAACCTGTCCTGCCGTAAATTATATTAATTAATTTATCTCACATAAAAACATC

AAAGTATATAACCGCAGCTGCTGGCATACTATAAGCTTGATAAAAATAATTAAAATCTTTTGTCAAAATT

TATATAAAATTTTTTAGTACAACACAAGCTCTCAAAAAAATTATGTTCCTAAATTTTCACTTTATTTTTC

AAAACCAATATCAAATTTTTTACATGTTAAAATATTATAAAACAAATAAAAAATTAAGTAATATTAATTA

TTATAAAAATATTTAAATTTTTCTTTCAAAATCAAAATTTGATATACCAATATATTATATAATAGGATAA

GCTAAACAAGCTATTGAGTTCATACCTCAACGATAAAACCCTTTTCTTATTAATCAATAAAAACTTACCG

CTTATGAGAATATTTTATTTAATCAGACTAATAGGCATAATTAGCTCAAATAATTGATTTATATTTTGAA

TTTTTATAGAAATAAATTCCTTATGCTTTATCCCATTGATATTAATTAAAAAAACAAAAAAAGGGGGTGA

AGCTTCTTTATTGTACTTTATCGTGCAAGGAATTAGCTCAATATTTTTATTGATAGCCATAATTAATGAA

GAAAGTTCACTAATAGATGTATCAGAACCAAACAGCAGCCTCATCACAGTAGCCTTTTTAAAAATAGGGG

CAGGGGTTTTTTTTAATTGATTATTCTTATTAAGCTTTTCCATTACTTTAAGAATTTTATTATTAATCCT

CACCCTACAGAAATTAAGAGGATTTTTTCTTCTTCTTTTAAGACAAGCCGGCTTGTCTTATTTAATATTA

ATCTTTATTTTTCTTTCTTCTTTTATAGCTATATTCATTAATATAAAACAAAATTTATTTAAAAGAATGT

TGACAGTTTCAAGATTGTCCAACACCAGATGACTCTTGACCGCAGTTGTAACAACATATTCTGGATGAAT

ATTTTATTTTGCAGTGTACTCATTTTCTTTAGTATTAAGTTCAACAATAAATAATAAGTATTTAGACCAA

AATTACCGTAATAGAGACACGCTAGAAAACCCCCTTTTATTTTTAAGCATAGGAGGACTCCCCCCCATAC

CAGGATTTTTCCCTAAAATTTTAATTCTGATAAATTTAAGATATTCTCGGTTAAGATTGCTAAGAATTTT

TCTCCTTCTTGCCGCGTGTGTAGATATTTTTATTTATTTACGATTTTCCTTCACAAGAGCATTGAAAAAT

AATGGTAATCTTATATATTGTAAAGCTGTAACAACAAAGAGAATTAAAATACTGTCTTTAAGAGCAGTCA

CTATAGTCACAATAATAGCAATTATATTATAAAAAGATTTTAAGTTAAAAAAACTAATGTGTTTCAAACA

CTTCAATAATGAAAATTTAAATCTTAATTTTAAAGAAAAACTTTTTAAATATGCTTGCAACATATCATAT

AAATAAAATTTCATAACAAAAAGAAAAAATCTATATGTAAATTTACAATTTACCGCCTATACTCAGCCAT

TTTGACTA

>NC_015829.1 Thulinius sp. DVL-2010 mitochondrion, complete genome

AATGGCTAACTGAGAACAAATCAATTTCCAAAACAGAACATCCCCCCTAATAGAACAATTCATTTTTTTA

CATGACTTCATTATAACCTTACTAATACTAATTATTTCACTTGTTTTTTATATTATTATTAACATTATTA

GAAATTCATTCGTTACAACTAAAACTAAAGATAATCACGAATTAGAAGTATTATGAACTTTCTTACCAGG

CTTAGTCCTTATCATAATTGCTTTTCCCTCTTTACGTCTACTATATATAAGTGAAGAAAACAAACAAAAC

AATATAAATATTAAAGTAATCGGCCATCAATGATATTGATCCTACGAATACTCAGACTTCAAACATTTAG

AGTTTGATAGATTTATAACAAATATCGATAACACTAACCATTTTCGACTTTTAGATACAGATAATCACAC

TACAGTGCCTGAAAAAACTCCAATCCAACTATTTACAACCTCAGCAGACGTATTACACTCTTGAGCAATT

CCAAATTTAGGAATCAAAACTGATTCCGTTCCTGGGCGTCTTAATTCTATCAACATTTTTTGTATCAAAC

CTGGCTTATTTTTTGGTCAATGTTCAGAAATTTGTGGGACTAATCACAGATTCATACCTATTGTATTAGA

CGTACGACCTCTAAACATCTTTAAAACTTGAATTACTCATTTCCTGAACTCTTTACAAAGAAACCCTGAA

CTTTTAATTCACTTAAGCTTTATATAAAAGCCTTTGTAACAAATAAAAATTAGTTTACAATAAAAACATT

AAATTGTCAATTTAAAAAAACTTTCAAGTATTTTTAAATTCCACACATAGCCAATCTCCCATGACTCGAA

TCTTACTGTTCTGTACTACTAATTTTAATTATTCTAATATCTATGTTATTCTTTTCTCCGTCAACTTTCA

CAATCCTAAGAAATACCAAAAAAATATCTAAAAAAAATTACTGAAAATGATAAATAGTCTATTTGAATCT

TTTGACCCACTCCTTAGAGCTTTTAATTTTAACCTATTAGCCTATATTCTACCAATTCTCTTCCCACTAA

GAAAAAACATCTCATTTCACAGAAATCGTTTTAGTACACTAACAAAATCCCTAAATTCTTATCTATTTAG

AGAATTCAGAGCCTCCACAAGAAGAGCTCATAACAAAATAAAAACACTCTTTTTAGCCTCTATTTTCTAT

TTCATTTTGTTATTAAATTTAACTGGTCTTATTCCCTTTGTTTACACAATGACAAGACAAATAATAAACA

CACTAAGATTAGCCCTTCCCTTCTGATTAGGATTTATCCTCTTTAGAATACTAAACAATACCAACCACTT

TCTCAGACACCTAGTTCCTTTATCCACCCCTCTGTTACTCTCACAATTCATAACTCTCATTGAAAGAGTT

AGACAAATTATTCGACCTATCACACTATCCGTTCGTCTTTGTGCTAACATAACTGCAGGGCATATTCTAA

TAGCTCTCAGAAGACAACCTATTTTTTTACTAAATTTCTTTTCCAGCATCTTAATAATTCTCCTAATTTT

AGAAATTGCTGTAGCTTTTATTCAAAGATATGTATTTACTATGCTCCTGTCTATGTACATTTCAGAAACT

TTATAACATATGTCACAATTTCATTTTTTTCACATTATTTCTCCAAGACCATGGCCACTCATTGTAGGAA

TTTTTGCTATAAACTCATTAGCTAGTGTAATTTTCATAATTATAAATCACAATAATTTTATTTTACTGCT

AAATACCTTATTGCTTATAATCACAGTCACTAGATGGTGAAAAGATATCTCTAAAGAAAGATCTTTTCAA

GGATACCACAGCACTCAAGTAATAAGTGGGCTACGCGCAGGAATACTACTATTTATTATTTCAGAAATTT

TATTTTTTGTATCTTTCTTTTGAATATTTTTTCATAGGAGATTAGCCCCGACCATAGAAATTGGAAATAT

TTGACCTCCTCTAGGAATTCAAGCCATAAATCCATTCCAAATTCCGCTTCTTAACACAGTAATTTTACTC

TCTTCAGGAATCACAGTTACTTGAGCACACCACTCCATAATAAAAAATAAAATAAAAATAACACACAATA

GACTCCTTCTCACCATTATTTTAGGAGTTTACTTCACTATTCTTCAAGGATGAGAATATTGAGATGCCTC

TTTCACTTTTTCAGACTCTATTTTCGGTTCTTCCTTTTTTATTGCCACAGGCTTTCATGGTCTTCATGTA

ATTATTGGCACCATTTTCCTATGAGTTTCTTTTGAACGATTCAAATCAGGATTATTATCACAAACACACC

ACTTAGGTTTCGAAATATCAATTTGATATTGACATTTTGTAGATGTAGTCTGGTTATTTCTTTATAGCTT

CCTGTACTGATGATCTTACTTTGTTATTAGTATAAAAAGTATTTTTAATTTCCAATTAAAAGGTTTCAAA

TCAAAATAACAAAATTCTAACAATTTTCTATTTTCTAATTTTTCTCTGTATCATCATATTTATCCTATCA

AGCAAAATTAAAATCAAAAAATTAAAACAACGAGAAAAAAGATCACCTTTTGAGTGCGGATTCGACCCAA

ACCACAAACTTCGAAATTCTTTTTCTTTACGATTCTTCTTAATTACCATCTTATTCCTAATTTTTGACGT

GGAAACTGCCATTCTTCTCCCGCTTCCCCTTAATAGGGGCTCCCTAAACCCCACGTTATTAATCTCCGTA

AGATTATTCATCTGCACAATTCTAATTTTAGGTATTTTCTTCGAATGATCACAAGGAGCCCTTTCTTGAA

AATAAGAACTTATATTTAAAATCTCATAAAATTTAATTTGCAATTAAAAATTGTTAAAAAACTAAGTCCA

AACAAAAAGCTAAATAGCATACAATTTCGACTTGTACATTGATTCACAAATCTTTGTTTAACTCATTTAA

ATAGTGACTGAAAAAGTATTTAGTTGTTACCTAAAATAATGAATTATTTCCTATTTAAAAGATTTTAAAC

ATAAAGCCGCTAACTTTATCTATCGTATTCTATGAAAATCTTTAAATTTTATAGTGTAATCAACACAATG

TAATTTCATTACAAAAATGCTCAAACAAGCTTTAATTAAAAATAAGATTATCTTCGTTTCTTCAAAACAA

GGCTTTAAAATTAAGCTATTTAATTATATCACAAAAAAAAAAAAAATTAACAGCGGGAAAAAAAGAGAAA

AAAAAGCACCAAATATCTTCATCGAAATAAATTTTATTGTTACTAAACCAGAAGGCCCTAATTGCTCTAG

TCACCCCTGATCTATAATTTTAGCATACTTAAGAGAATTAAAGAACACCCACGTAAACCTACGAGAAGAA

AAAATTAATATCAGAAACCACATACACCTGAAAAAAAACTTTTTTAAAACAAAAAAAAAATTATTAAGCA

ATCCTGTAATACACAGCCAACCACTCAATATTAACCTTAAAAAATAAAGTAATTTCCAACCACTAGAAAC

AAAAATCAAAGAAGAAAGAAAAATAAAATTTTCCGCTCAAAAATTTCCTATTCTCAGAGCCAAAAAAACC

AAAAAAAAAATAGGAAACAAGATTCAATAAATAGAGTCCCTCAAAACAAAATTCTTATTCCGAACAAAAA

TTTTATTAAATAATAAAAAAAATCTAAACCGAAGAGAATAAAACACAGTTAATAATACCCCCCTCAAAAA

AAAAAAAAAAAATAAAATAACCACTAAACCCCCATCTAGAATCAAATCCTTAGAAAAGAATCCAGAAGTA

AAAGGAAACCCACACAAACACAATAAACACACCAAAATAGATCTTTTAATAACAGGAAAAAAAACACCAA

CTGACCTAACATTACGAAACTCTTGTCTATTATCATGTGTATGAATAACAACACCAGAACACATAAAAAG

TGATGCCTTAAATAAAGCATGAGTGATCAAATGAAAAAAACAAAAAATTACCAAAAAACAGGAATAAGAC

GACACTATAAAGCCCAATTGACTGAGAGTAGAAAAAGCAATAATTTTTTTTAAATCCCAGTCTAAATTAG

CTAAAATGCCCGAAACACAAATAGTAAAAATAGACACAATCAGCAATCATTTTATCTGACCGACCAATAA

ATTAGAAAACCGCACTATTAAATAAACACCAGCCGTCACTAAAGTCGAAGAATGAACTAATGATGAAACC

GGAGTCGGTGCAGATATAGCCGCGGGCAATCAAGAAGAAAACGGGACTTGAGCTCTTTTAGTCATGAAAG

TCATACTCATTAACAAACCAATAACTCAAAAATAGAATTTTTGGTCAATAATTCTTCAATCCATAATCAG

AGAAAAAAAACAAATAGAAGAAAAAAATAAAACATCCCCCACACGATTAACTAAAAATGTTAAAAGGCCA

GCAACCGATCTCCTGTAATTTCTGTAATACACAACAAGTAAATAAGAAGTTACCCCTAACCCATCTCAAC

CTAATAACATAAAAATTAAATTTGGTGAAAAAATTAAAAAAACTATAGACAAAACAAATAATCTTAACAA

ACTAATAAAAACTTTCAGATTTTTTTCTTGATCCATGTAATATTGCGAAAAAAAATAAATCATAGAAGAA

ATGATTATAACTGTAAAAAAAAACAATACAGAAAAAAAGTCCAAAATAAAAATAGCTGAAACATGAAACT

TAGTTAACGAGAAAACATCTAATTCTAAAAAATAAACTCTTTGAAGTCCAATAAAAAAATACAAAATCAA

TCTAATAAAGAAAAATAAAACAGATAAACCTACAATTGTCTAAAAAACTCTCAACTAAGAAACCACAATT

CTTTATTTTTTTTAAACTATTTAGACATAAGAATAAAATAAGTTTCAACACTAAACCAACTAAAGGAACA

AAATGTAAGATACTGAGCATAAATAACAAATCAATCTCAGGCATCAAACTTTTGAAAAAGTTTAATCGAC

CATGAATTGACACTATAAAGAAATAAATACAAAAAAAAGACACAATCATTATATTTAAACCTCTCACAAT

TCAAAAAAGAAAGTTTACTCAAAACAAGCCCCCTATAACAAACAATTCTCCAAAAATTCTTAAAAAAGGA

GGTACAGAAAAATTAATCAACAAAAACAAAATTCAAAAAATAGAAGAACATAAAAATATTTTAAAACGAC

CACGAGAAATTAACAATTGACGACTAAAAATTTGATCGTATCTTTGGCCCGACAAAAAAAACAAAGCAGA

AGAACAAAACCCATGAGCTAAACTAATTAAGAATACTCCCGTAATTCTATCTCAAATTTGAGTTATCAAA

CCGGCTATTAAGACCCCCATGTGACTCACTGAGGAATAAGCAATTAAGGATTTAGTATCTGTTTGCGTCA

CACAGATTCATGCAGCTAATACAGACCCAATTAAAGTTATAAGAAAAAAACAATTTAATAAAACATTAGT

TTTCAAAAAAAATAGAGTTAAAATTCGATACACCCCGTATCCTCTTAACTTTAATAAAACGGCAGCCAAA

ACTATTGAGCCAAACCCAGGTGCCTCAACATGAGCTTTAGGTAACCACAAATGAACTAAGTATATGGGCA

ACTTAATAAAAAAAGAAAACATAACAATAACGAAAAATACAACCCAAACAAAAGAAAAATTAAAATTAGA

CCTAAAAAAAACTCATCTTAAATTTTTATCAAAAGAAAAAATAGAAAGCAAAACCATAAGCAAAGGCAAA

GACCCCACTAAAGTGTAAATAACGAGATAAAATATCGCGCCAATACGCTCAACTTGATATCCCCACCCTA

AGATTATAAAAATCAACGGAATTAAAGAGATCTCAAAAAAAATATAAAACCTCATAAAATTCAAAGACAA

GAAAGAAAAATTTAGAAAAAAAAATAACAAACCCCTCATTAACAATAATAGAGCTAATTTTATTTTTTTT

TTATAAGAAAAGAGCAAAATTTTAATTAAAAGAGCTAATCAACTTCTGATTAAAACTAGTAAAAAGGTAA

ACTTGTCTCTAATAAAGAATAAATTTGCTGATCAAAAAAATCTAAAATTTGGATAAATAAAAAAAAAAAA

AAAAAAAATTATAATAACTAAATAAATACCTGAAGAGTGAAATACAAAAAAAATTATTAAGGGGAAAATT

AAAATTTTATTAAGCTCAAACTAGATAAGTAATCTTTACTATAAAATCGAATTATAAAAATGAACAAGAC

TAACCCCACAATAGACTCACAAATAGAGAACCTAACAAAAAAAATAGGTAACAATATTAAATCTCTGAGA

TTTTCTCTGTTAATCATTAACATTAACAAAAACAAAACCGCCATTTCTAAACTAACCAATAGACTTAATA

AATGCGAAGTCTTAACTAAAATTAAAAAAAAACAAAAATAAAAACATACAAAGAAGAAGAAAATTGTTTT

TATAGTTTAAAAAAAATAGTAATTTTGTAAATTAAAGATAAATTATTTTAAAAACTTCAGAAAATTTCCA

CATATCTTAAATCTCCAAAATTTATATTTTTTTTTAAACTATTTCTGAAATTTTGTTTATAACAACTCTT

TTCTCTTTAACTGCTTTAATTGTTTTAACAGCAAGAACTCATCCTCTAATTTTAGTCTGCGCTATAATTT

TCCAAACTACTACTTTTTTCTGTTACTCTTATTTAATTACCCCCACTTCATGAATAGCTTTCATTATTTT

CCTAGTAATAGTGGGAGGCCTTTTAATTGTTTTTTCATATCTATCCGCTTTAGTGCCAAATGAAATATTT

ATCTTCAAACTTAAATATTTAAATCTATTAAGAATTTTTATTTTAACTACAATATTAAATTCCCAGTTTT

TTACTTCTAAAATTACAATAAGCGAATTTGCTTTTAAATTTTCACAATTTCAACTATTAAAAATAGTAAC

CCTCATATTCATCTATTTTCTAATTGTGATATTCATAGTCATATTTATAACATCTTTTCTGAAAGCACCA

TTAAAAACGAAAATTACTTATGCAACCTATCCGAAAAACTCACCCTATTCTTCAAATATTAAACTCTTCT

GTAATCGACCTACCGGCCCCATCAAACATTAGTCATATATGAAATTTTGGATCTATACTAGGAGTTTGTC

TTACAATCCAAACATTAACAGGAATTTTTCTCACTATACACTTTTCTTCAGACATCAGTACTGCTTTTAA

CTGTATTGACCACATTATACGAGATGTTAACGCTGGTTGATTTATGCGCTTGCTTCATGCTAACGGAGCT

TCTCTTTTCTTCTTTAGAATCTACATTCACATAGGACGCGGACTTTATTTTAACTCATTTCTTCTAAATT

TCACGTGAATAACAGGAGTGGTAATTTTCTTATTAACAATAATAACAGCTTTTTTAGGTTATGTTCTTCC

TTGAGGTCAAATATCTTACTGAGGAGCAACAGTCATTACAAATTTACTTTCAGCAGCCCCATATGTAGGA

GCCTTGCTAGTTGAATGAATTTGAGGGGGGTTTTCAGTAAGAAACGCCACTCTCACACGATTTTTTTCAT

TACACTATCTCCTACCTTTTGTTATTATAGCTTTCATTGTAATCCACTTAATTTTTCTTCATGAACAAAA

ATCTTCGAATCCGTTAGGTATTCAGAATCCTATCGATAAAATTTCATTTCATCCTTATTTTATTACAAAA

GATATAATTAGTATATTATTTCTCTTATTTAGCTTTGTACTTATCAACAAGCTAATCCCATTCAGACTAA

TAGATCCAGAAAACTTTACACCAGCAAACCCCCTCGTAACTCCTACTCATATCCAACCAGAATGATACTT

TTTATTCGCCTACGCTATTCTTCGATCTATCCCAAACAAATTAGGAGGAGTACTTGCTCTCCTTTTTTCT

ATTTTAATTATATTCCCTTTAGCTTTAAGAAAAAAAACTCATCAATCTAATAAATATAAAAAAAATAATC

AATTTTGACCTTTTTCTATTATCTTCTTATTATTAACCTGGCTAGGTATAAAACCAGTTGAAGAGCCTTT

TATTACCTTAGGAGCTTTCTTAACTTTATCATATTTTGCTTGATTTTTCTGAATTTTTTTTTAAATCGTT

TATTGTATCTTGAAAATACACAAAAAGTTCTTAAACTTACGATTTTAAACTAAAAAAAAAATAAACATGC

CCCAATATATCAAAATTAAAAATAAAAAATTTTTCCATATGAGAGATATTAAAATATCATATCGAACACG

CGGATACGAAGAACGTGCTAATAAAAATAAGCCCACACTCACCAATAAAAAGTAAATTTTACCAAAAAAA

ACAAAAGACATGAAGAAAGAAAATCAAATAATATTAGCATATTCCGCTATAAAAATAAGAGAAAATTTTA

AACCCCCGTATTCCACATTAAACCCAGAAACTAATTCTGACTCCCCCTCAGCCAAGTCTAAAGGTGCCCG

ATTAGTTTCTGCCAAACAACAAATAAAACACATCAAAAACAACTGGAAAGAAAAGAAAAAAACAAGCAAC

CGACCACTTATTTTAATTAACACACAAAAATCAAGAGAATAAACCAAAAACCCCATCAAAAAAACAAAAA

AAACTAATGGAATCTCATACGAAATAGTTTGAGCTAAAGCTCGCAAAGCCCCCAACAAAGCATATTTAGA

GTTAGAAGCTCATCCCGAAAAAATTATTCCATAAATCCCAACCCTAAGTAACAAAATAAAATAAATAAAA

GAATACTTAAAATCCAAAAATCCCGAATAAGAGATTAAAATAACCCAAAATAATAAAGCCACAAAAAAAG

AAAAAAACGGAGATAATCTAAAATAAATCAAATTATAAGTAACAATAAAAATTTCTTCCTTAGAAAATAA

TTTCAGAGCATCTGCAAAAGGTTGCAAAATACCAGCTACTCCAAGCTTATTAGGACCTTTCCGTCTTTGA

GAATATCTTAACACTTTACGCTCTAATAGCGTCAAAAAAGCTACACTAATTAAAACAAGTAAAATCCTTT

GAACAAAAAAAAATATAATATCAATAACATAAAAAATTATTAAAAGGAAACCCATATTTGAAGCTTAAAT

TCAATGCACTTATTCTGCCATTTTAATATAATAAAGAAAAATACTTTTATAATTTACCCTATCAAGATAA

CCCTTTTTCAGGCACTTTATTGTAAGATCTACTTATTTTTAAATTCTAAATTTAATACATTTTTCTGCCA

ACAAAAATCAGAGAAACTTTCACACTAAAGCTCTTATAAAAATTCAGATCTCCCTCCCCTGACTTACATT

CCCCCCACCAGACAACTCTTAAAACCCACTTCACTCGTATTTAGCATACAACCGTAAACTTCCTTCCATC

CTCACTACAAAACTTTTATTTACGTACCTCACTCGTATTTAGCATACAACCGTAAACTTCCTTCCATCCT

CACTACAAAACTTTTATTTACGTACCTCACTCGTATTTANCATACAACCGTAAACTTCCCTCTCCTTTTC

ATAATATAGGTCTCCAACCGAGATTCAATTAAACCGGACCTTTCTCTTGACTCTGCATATTTTGGACATG

ACACTTTTTCTATAACCTGCTCTCATGAATAAACTCGCAGTTTTGCTAAACCCCTTTAATAAATATGCCC

TCCGGGCCGGCTGCTCTATTTCACAAATTTAAACCTTAGAGATAGCCATAATTTTAACCTAAGTGAACCT

GCCTCCCAACAATCCAGGTAAACTTCCTTCCATCCTCACTACAAAACTTTTATTTACGTACCTCACTCGT

ATTTAGCATACAACCGTAAACTTCCTTCCATCCTCACTACAAAACTTTTATTTACGTACCTCACTCGTAT

TTAGCATACAACCGTAAACTTCCCTCTCCTTTTCATAATATAGGTCTCCAACCGAGATTCAATTAAACCG

GACCTTTCTCTTGACTCTGCATATTTTGGACATGACACTTTTTCTATAACCTGCTCTCATGAATAAACTC

GCAGTTTTGCTAAACCCCTTTAATAAATATGCCCTCCGGGCCGGCTGCTCTATTTCACAAATTTAAACCT

TAGAGATAGCCATAATTTTAACCTAAGTGAACTTGCCTCCCAACAATCCAGGTAAACTTCCTTCCATCCT

CACTACAAAACTTTTATTTACGTACCTCACTCGTATTTAGCATACAACCGTAAACTTCCTTCCATCCTCA

CTACAAAACTTTTATTTACGTACCTCACTCGTATTTAGCATACAACCGTAAACTTCCCTCTCCTTTTCAT

AATATAGGTCTCCAACCGAGATTCAATTAAACCGGACCTTTCTCTTGACTCTGCATATTTTGGACATGAC

ACTTTTTCTATAACCTGCTCTCATGAATAAACTCGCAGTTTTGCTAAACCCCTTTAATAAATATGCCCTC

CGGGCCGGCTGCTCTTATTTTATAAATGTTAATTTGTTAGTTTAAATTTAGCATTATTGGGACCAAGGAG

TAAGCTAAATACTAGAAAAATCCTTTCGTACTATTCCTAGCTGATAAAAAATAAAAACCAATCTGGTTTA

CACCGATTTGAACTCAGATCATGTAAAATTTTAATTATCGAACAGATAATCTTCTTTTACGGTTGCGTAA

AAAAGATATTTTAATCCAACATCGAGGTCACAAACTTAAAATTTAATAAGAACTCTTTTTTTAAATTGCG

CTGTTACCCCTAAGGTAATTTTCTCAAAATTTAAAACTTTAGGTCTTTTTCAAATAGATTTTTTTTTCTA

AAACTAGTAAAAAAGTTAGCCGCCCCAGCTAAGTTACTTTAAATAACAAACTCTTTATAGGGTCTTCTCG

TTTATTTTATAAATATAGGCTTTTTCACATATTTATTAATTTCAAGAATAAAAAAAAAAAAAAATAAAAT

TATTTCTCCATTCATACAAGTCTTTAATTAAAAGACAAATGATTATGCTACCTTTGCACAAAAGCGGCTC

TTCAAAGAATCAGTGAGCAGAAATTACAAATTTTAAAACAATTTGCTATGTTTTTGATAAACAGTTAACT

TTATTTTGTCAATTTCTTTTTTTTTAATTACTTTCTTATTTACTTATTTTATCATTTTAAATTAAAAAAA

ATTCAAATTAAAAAAAATTCTTAAAAAAAATTCTTAAAAAATAAAAAAAGTTATAAAACTCAAACTTTTA

TTTATGATATAAGATAAAATCTAGCTATTTTTTACAGAAAAATAAATAAAAGCATTACTTTTATATGAGA

TAAAAATTCTAAAAATTCTAAAATTTTAAACTAGATATAAATAAAATCATAAATTTTCTTTAATATCATT

ATTTTTATTTTTTTCCACATTTTTCTTAACCACAACATAATAATGATATTTTTTATTTTCTAGAAAATTA

AAACTTTCAAAAAATTGATAAATCCTTATCCACAAAACACAATAAATTAATAAAAACTTTTCTTTCGCCC

TCCCTTACGTTTAAATTTAAAGATTTATTAAAAAAAAAAAAATTAACAAAAAAATTAAAAAGATCCTTTT

TGGATAATAATTCATTGTAAAAGAATTTTAACTTTTTACAAAGCCATCTTCCGATAGTTTCACTATGTTA

CGACTTCTCTTACTTAAAAGTAAGAATGACGGGCGATATGTGCATAATAAAAAAAAATTCATATTATTAA

CATCTATAAAATTACTTTTAAATCCATTCCTTCTAGTATTCGATTACTTTAAAACAAATAAAAACTTGTG

GCTAATAGATTTTATTTTTATAGCTCTATAAGGATCTAAATAGAGAAAACTATTCTTAATTTTTTTCTTA

TTTTAAATAAATAGCAATGACCATATAGAAACAAAAAAAAAATAAAATAAAAGTGTATTTTCTTATCAAA

TTACAAGCCCCTCTAATTTTTTTATTACCGCCAAATTTTTTAATTTTTTAAAATACTATTCTAAATTTTA

GATTAAATAACAAGGTATCTAATCTTGGTTTTAATAAACTATTTTTTTTGAAAACAAAAAGAAAAAAAAA

TAAAAATAAAAAATTTTACTTTTTTTTTAGCAATATTTTTTCTAAAAATCTCTCCAATTAAACCTGACAA

AATAAATAACCGCAGCTGCTGGCATATTTTTTGCTTGTGATAAAAATAAACTTTATTCATAAATTAAAAA

ATATTAAACAGTACCTTTTATTAAGTACCTGTCTTTACTAAATAATTTTACCAAACTAAAATCAAATTTT

CCTAAATTTTTACTAAAATCACAACATAAAAAATTAAGATAGAGCGAACTATATTCTTAAACTCAAAATT

TAATGTAAATTATACTACTTAATAAGATAAGCTAAAAAAGCTTTTGAGTTCATACCCCAAAGATAAAATA

TTTTTCTTATTAATTAATAAAAATTTCCCGCTTATTATCCTTTTTTATTCAATTAGACTAAGAGCTCCAT

TTTCCCTGTCTAATTGATTTTCTTTATGAATAACTCTCGAAATAAACACTTTAAGATTTTTAACTCTTTA

TTTATTTTTTTTTAAAAGAAATAAATTCTCAGAAAACGCTATAACTTACTTTCTAATCCAAGCTATTAGA

TCCATTATTTTAATGAGAAGATTCTTTAATATTTTATGCTTTAGAACTTTTTTTGATATCAGAATTCTAT

TTTTTTTTTCGATCCTATTAAAACTAGCTGTTGCTCCCAATCACTCATGGTTAATTCCGCTCACTTTGTC

TAGCCCATGATTATTAACTTTCTTACTCTTAACTTTACAAAAAATTATCCCAATCATTTTCTTAGAAAGA

AGACAAATAGAGCTTAATTTTCTTATTTTACTATTTTCTCTTATTTCTGCAGTTACCGGCAGAATAAAAA

ACTTAATTAGAAAATCCCTTAAAATACTACTCATCTTATCAAGAATTAGTAACATATCCTGAATTTTAAT

TGGAGTGATAATCTCATCCATACTGTGAAAATTCTTTTTCCTCATTTATTTTTTTTCTCTCAACTTCATC

TTTCTGAGAAAAGAAAAAAATCAAAATTTCAACTACTCACTAATAATTTTCCTCAACTTGCTCAGAATCG

GCGGAATCCCCCCTATAATAGGATTTTTCCCCAAACTTAATATTTGTGCAGAACTACTAAATCTTAATTT

AAAGTTTATTTTCGTTTTACTTTTTATTTTATCTATTTTAGACTTATTTGTATACCTGCGACAAACTTAC

TTCGTAAATTTTTCGACACCTGCAACACTAATTTGACAACATCAAATGAAAAAGCCCTTAAAAACATGAA

TAATTTTAAATTTCATTATTTTTCTTATAATACTTTAAAAATTTTAAGTTAAATAAACTAAAGTATTTCA

AATACTTCAATAAAACATTTTTAAATTTTAGCCTGCACTTAGAGGAACTTTAAATTTGCACTTTAAACTA

ATCTAAAATCAAAAAGAAGAAATTTCTATGACTAAATCTACAATTTAGAGCCTTTATCAGCCATCTTTTT

CCTGCGATGACTATTTTCAACTAACCACAAAGATATCGGAACATTATATTTTTTATTCGGACTTTGAGCA

GCCACTATTGGTACTTCTTTAAGATTTATTATTCGACTAGAACTATCCCAACCAGGAAATTTATTTTCAG

ACGAGCAACTTTACAATGTAACAGTAACTGCTCATGCATTTATCATAATTTTTTTCTTTGTTATACCTAT

TCTTATTGGAGGATTCGGAAATTGATTAGTTCCGNTTATAATCGGAGCCCCAGATATAGCATTTCCTCGA

ATAAATAACCTCAGATTTTGATTATTACCACCATCCTTTCTTTTAATTTTAAGCAGCACCTTAGCAGAAC

AAGGTGCTGGAACTGGATGAACTGTGTACCCCCCTTTAGCTCATTACTTTGCCCATAGAGGCCCTGCTGT

AGACTTAGCTATTTTCTCCCTGCATCTTGCAGGAGCCTCATCCATTTTAGGAGCCATTAATTTCATTTCC

ACAATCTTTAACATACGAAGACCAAGAATAAAAATAGAACAAATACCCCTATTTGTTTGGTCTGTTCTTC

TAACCGCTATCCTACTTCTTTTATCTCTACCAGTGTTAGCAGGAGCTATCACAATATTACTTTTAGATCG

TAATTTTAACACTTCTTTTTTCGATCCAGCAGGAGGGGGAGACCCTATTCTTTATCAACACCTATTCTGA

TTTTTCGGACATCCAGAGGTCTATATTTTAATTCTACCAGGATTCGGCATTATCTCCCAAATTATTGTTC

ATTTAAGAGGTAAACATTTAACTTTTGGTCATTTGGGAATAATTTACGCCATAAGAACAATTGGACTTTT

GGGATTTATCGTTTGAGCTCATCACATATTCACCGTAGGCATAGATCTAGACACTCGAGCTTATTTCACA

GCAGCAACTATGATTATTGCCATCCCCACTGGAATTAAGGTATTTAGATGACTTAGAACACTATATGGAA

CTAAAATCACTTCCTCCCCTTCCCTTTGATGAGTATTAGGCTTCATTGCTCTTTTTACTATAGGAGGCCT

AACAGGTATTATACTGTCTAATTCCTCTCTCGATATTCTCCTTCATGACACCTATTATGTTGTTGCCCAC

TTTCATTACGTATTGTCTATAGGAGCCGTGTTTGCTGTAATAGCCGGATTAATACAATGATTCCCACTAA

TCATAGGAGTCTCTTTAAATTACAAATGATGCTTATCCCAATTCATTTTAATATTTATTGGGGTAAACTT

AACCTTTTTCCCACAACATTTTTTAGGCCTATCCGGCATACCTCGTCGTTATGTAGATTACCCAGATACT

TTTTTCTCGTGAAACTTAATTTCATCGTTTGGCTCTATTTTATCTACTTTTGCTAGATTATTTATATTCT

TTATTGTTTGAGAAAGTCTAATCTCTCAACGACAAGTTATCAATAATTCCTCCAATAACACCCTTTTAGA

GTGAAAGCAACAAATGCCCCCACTTTCTCACACTTTTTCTCAACTAACAATCAATACTAAGTACTAA
